# Supplementary material
Source: publisher figshare collection journal article supplement (https://gsajournals.figshare.com/ndownloader/files/22423689)
Supplement: Supplementary file 1 [file 22423689]

## Sheet: GO
Table S3. GO and KEGG enrichment analysis of differentially expressed circRNA-hosting genes
GO_ID	GO_Term	GO_function	GO_class	Genes	S gene number	TS gene number	B gene number	TB gene number	pvalue
GO:0043531	ADP binding	molecular_function	9	circRNA282(LOC111878917);circRNA283(LOC111878917);circRNA31(LOC111914799);circRNA32(LOC111914798);circRNA365(LOC111910617);circRNA51(LOC111879789);circRNA536(LOC111879789);circRNA646(LOC111917394);circRNA878(LOC111917404)	7	305	10	1283	0.00246617
GO:0005524	ATP binding	molecular_function	9	circRNA102(LOC111889528);circRNA103(LOC111884224);circRNA112(LOC111878066);circRNA114(LOC111896753);circRNA115(LOC111896753);circRNA116(LOC111896753);circRNA120(LOC111904707);circRNA122(LOC111892623);circRNA1250(LOC111917198);circRNA1331(LOC111876416);circRNA142(LOC111913556);circRNA168(LOC111894897);circRNA180(LOC111886177);circRNA184(LOC111889346);circRNA188(LOC111880132);circRNA189(LOC11188013…	45	305	135	1283	0.00495749
GO:0016705	oxidoreductase activity, acting on paired donors, with incorporation or reduction of molecular oxygen	molecular_function	5	circRNA26(LOC111915462);circRNA333(LOC111903253);circRNA62(LOC111903253);circRNA662(LOC111902705);circRNA915(LOC111886576)	4	305	5	1283	0.0127682
GO:0048510	regulation of timing of transition from vegetative to reproductive phase	biological_process	11	circRNA1370(LOC111884458);circRNA413(LOC111883669);circRNA4(LOC111890053)	3	305	3	1283	0.0133337
GO:0005506	iron ion binding	molecular_function	8	circRNA26(LOC111915462);circRNA333(LOC111903253);circRNA62(LOC111903253);circRNA662(LOC111902705);circRNA915(LOC111886576)	4	305	6	1283	0.0311582
GO:0010072	primary shoot apical meristem specification	biological_process	7	circRNA1176(LOC111881919);circRNA53(LOC111894934);circRNA81(LOC111876998);ciRNA11(LOC111921286)	4	305	6	1283	0.0311582
GO:0019825	oxygen binding	molecular_function	4	circRNA333(LOC111903253);circRNA62(LOC111903253);circRNA662(LOC111902705);circRNA915(LOC111886576)	3	305	4	1283	0.0438972
GO:0015031	protein transport	biological_process	6	circRNA1196(LOC111915286);circRNA12(LOC111890540);circRNA170(LOC111892874);circRNA228(LOC111880154);circRNA418(LOC111892811);circRNA443(LOC111889597);circRNA523(LOC111916853);circRNA719(LOC111895632);circRNA86(LOC111885653);circRNA87(LOC111885653);circRNA892(LOC111891116)	10	305	25	1283	0.0510912
GO:0009585	red, far-red light phototransduction	biological_process	8	circRNA703(LOC111884655);circRNA96(LOC111890907)	2	305	2	1283	0.0563714
GO:0000815	ESCRT III complex	cellular_component	12	circRNA12(LOC111890540);circRNA228(LOC111880154)	2	305	2	1283	0.0563714
GO:0010388	cullin deneddylation	biological_process	11	circRNA150(LOC111889217);circRNA85(LOC111885662)	2	305	2	1283	0.0563714
GO:0007031	peroxisome organization	biological_process	5	circRNA170(LOC111892874);circRNA376(LOC111915140)	2	305	2	1283	0.0563714
GO:0051262	protein tetramerization	biological_process	9	circRNA399(LOC111901299);circRNA71(LOC111888550)	2	305	2	1283	0.0563714
GO:0070626	(S)-2-(5-amino-1-(5-phospho-D-ribosyl)imidazole-4-carboxamido)succinate AMP-lyase (fumarate-forming) activity	molecular_function	7	circRNA399(LOC111901299);circRNA71(LOC111888550)	2	305	2	1283	0.0563714
GO:0004018	N6-(1,2-dicarboxyethyl)AMP AMP-lyase (fumarate-forming) activity	molecular_function	7	circRNA399(LOC111901299);circRNA71(LOC111888550)	2	305	2	1283	0.0563714
GO:0007034	vacuolar transport	biological_process	6	circRNA12(LOC111890540);circRNA228(LOC111880154)	2	305	2	1283	0.0563714
GO:0016308	1-phosphatidylinositol-4-phosphate 5-kinase activity	molecular_function	8	circRNA188(LOC111880132);circRNA189(LOC111880132);circRNA243(LOC111909829)	2	305	2	1283	0.0563714
GO:0031491	nucleosome binding	molecular_function	5	circRNA182(LOC111886220);circRNA488(LOC111886161);circRNA663(LOC111886161)	2	305	2	1283	0.0563714
GO:0008266	poly(U) RNA binding	molecular_function	9	circRNA325(LOC111895989);circRNA618(LOC111884373)	2	305	2	1283	0.0563714
GO:0032436	positive regulation of proteasomal ubiquitin-dependent protein catabolic process	biological_process	12	circRNA1031(LOC111878838);circRNA96(LOC111890907)	2	305	2	1283	0.0563714
GO:0019252	starch biosynthetic process	biological_process	9	circRNA114(LOC111896753);circRNA115(LOC111896753);circRNA116(LOC111896753);circRNA158(LOC111911063)	2	305	2	1283	0.0563714
GO:0008180	COP9 signalosome	cellular_component	11	circRNA150(LOC111889217);circRNA85(LOC111885662)	2	305	2	1283	0.0563714
GO:0006952	defense response	biological_process	5	circRNA282(LOC111878917);circRNA283(LOC111878917);circRNA31(LOC111914799);circRNA32(LOC111914798);circRNA35(LOC111897124);circRNA51(LOC111879789);circRNA536(LOC111879789);circRNA646(LOC111917394);circRNA723(LOC111897124);circRNA878(LOC111917404);circRNA935(LOC111901375)	8	305	19	1283	0.0584688
GO:0006511	ubiquitin-dependent protein catabolic process	biological_process	9	circRNA150(LOC111889217);circRNA209(LOC111898538);circRNA28(LOC111916610);circRNA610(LOC111907803)	4	305	7	1283	0.0592688
GO:0005768	endosome	cellular_component	9	circRNA13(LOC111881361);circRNA377(LOC111915143);circRNA57(LOC111897745);circRNA583(LOC111908040);circRNA766(LOC111878490);circRNA889(LOC111879838);circRNA935(LOC111901375)	7	305	17	1283	0.0842056
GO:0006886	intracellular protein transport	biological_process	7	circRNA126(LOC111892165);circRNA319(LOC111883268);circRNA362(LOC111887953);circRNA428(LOC111898325);circRNA443(LOC111889597);circRNA668(LOC111909608);circRNA718(LOC111915452);circRNA849(LOC111896910);circRNA882(LOC111893507)	9	305	24	1283	0.0919969
GO:0020037	heme binding	molecular_function	6	circRNA333(LOC111903253);circRNA453(LOC111878431);circRNA62(LOC111903253);circRNA662(LOC111902705);circRNA915(LOC111886576)	4	305	8	1283	0.0968579
GO:0005802	trans-Golgi network	cellular_component	10	circRNA13(LOC111881361);circRNA271(LOC111882405);circRNA377(LOC111915143);circRNA57(LOC111897745);circRNA583(LOC111908040);circRNA766(LOC111878490);circRNA86(LOC111885653);circRNA87(LOC111885653);circRNA935(LOC111901375)	8	305	21	1283	0.101036
GO:0005730	nucleolus	cellular_component	11	circRNA109(LOC111901567);circRNA110(LOC111901567);circRNA1196(LOC111915286);circRNA15(LOC111909092);circRNA182(LOC111886220);circRNA196(LOC111898038);circRNA271(LOC111882405);circRNA756(LOC111885992)	7	305	19	1283	0.141417
GO:0006012	galactose metabolic process	biological_process	9	circRNA229(LOC111893505);circRNA230(LOC111893505);circRNA358(LOC111913863);circRNA465(LOC111893505)	2	305	3	1283	0.142447
GO:0016125	sterol metabolic process	biological_process	7	circRNA468(LOC111900486);circRNA948(LOC111876869)	2	305	3	1283	0.142447
GO:0004175	endopeptidase activity	molecular_function	7	circRNA1296(LOC111894423);circRNA172(LOC111876505);circRNA421(LOC111876505)	2	305	3	1283	0.142447
GO:0005782	peroxisomal matrix	cellular_component	12	circRNA376(LOC111915140);circRNA9(LOC111901177)	2	305	3	1283	0.142447
GO:0017119	Golgi transport complex	cellular_component	11	circRNA246(LOC111877354);circRNA545(LOC111876115)	2	305	3	1283	0.142447
GO:0004467	long-chain fatty acid-CoA ligase activity	molecular_function	7	circRNA112(LOC111878066);circRNA285(LOC111878886)	2	305	3	1283	0.142447
GO:0006163	purine nucleotide metabolic process	biological_process	10	circRNA399(LOC111901299);circRNA71(LOC111888550)	2	305	3	1283	0.142447
GO:0009833	plant-type primary cell wall biogenesis	biological_process	8	circRNA583(LOC111908040);circRNA935(LOC111901375)	2	305	3	1283	0.142447
GO:0019464	glycine decarboxylation via glycine cleavage system	biological_process	11	circRNA325(LOC111895989);circRNA737(LOC111883291)	2	305	3	1283	0.142447
GO:0007264	small GTPase mediated signal transduction	biological_process	8	circRNA1196(LOC111915286);circRNA126(LOC111892165)	2	305	3	1283	0.142447
GO:0010119	regulation of stomatal movement	biological_process	6	circRNA20(LOC111885973);circRNA96(LOC111890907)	2	305	3	1283	0.142447
GO:0031122	cytoplasmic microtubule organization	biological_process	7	circRNA136(LOC111920529);circRNA169(LOC111919020);circRNA417(LOC111919020)	2	305	3	1283	0.142447
GO:0006378	mRNA polyadenylation	biological_process	12	circRNA179(LOC111918716);circRNA281(LOC111900081)	2	305	3	1283	0.142447
GO:0016926	protein desumoylation	biological_process	10	circRNA1296(LOC111894423);circRNA172(LOC111876505);circRNA421(LOC111876505)	2	305	3	1283	0.142447
GO:0008568	microtubule-severing ATPase activity	molecular_function	11	circRNA136(LOC111920529);circRNA169(LOC111919020);circRNA417(LOC111919020)	2	305	3	1283	0.142447
GO:0016929	SUMO-specific protease activity	molecular_function	9	circRNA1296(LOC111894423);circRNA172(LOC111876505);circRNA421(LOC111876505)	2	305	3	1283	0.142447
GO:0045087	innate immune response	biological_process	5	circRNA366(LOC111890173);circRNA86(LOC111885653);circRNA87(LOC111885653)	2	305	3	1283	0.142447
GO:0004252	serine-type endopeptidase activity	molecular_function	8	circRNA24(LOC111900783);circRNA25(LOC111900783);circRNA537(LOC111896900);circRNA543(LOC111887745);circRNA99(LOC111916189)	4	305	9	1283	0.142802
GO:0005975	carbohydrate metabolic process	biological_process	5	circRNA180(LOC111886177);circRNA358(LOC111913863);circRNA4(LOC111890053);circRNA78(LOC111886089)	4	305	9	1283	0.142802
GO:0004674	protein serine/threonine kinase activity	molecular_function	8	circRNA102(LOC111889528);circRNA103(LOC111884224);circRNA1250(LOC111917198);circRNA1331(LOC111876416);circRNA152(LOC111895907);circRNA168(LOC111894897);circRNA184(LOC111889346);circRNA247(LOC111905299);circRNA27(LOC111915463);circRNA347(LOC111921038);circRNA35(LOC111897124);circRNA405(LOC111920660);circRNA412(LOC111914158);circRNA474(LOC111899648);circRNA522(LOC111915463);circRNA674(LOC111905689)…	19	305	63	1283	0.142934
GO:0008380	RNA splicing	biological_process	10	circRNA167(LOC111921257);circRNA168(LOC111894897);circRNA338(LOC111887738)	3	305	6	1283	0.150023
GO:0009744	response to sucrose	biological_process	8	circRNA180(LOC111886177);circRNA245(LOC111898305);circRNA360(LOC111878746)	3	305	6	1283	0.150023
GO:0030244	cellulose biosynthetic process	biological_process	10	circRNA1250(LOC111917198);circRNA583(LOC111908040);circRNA935(LOC111901375)	3	305	6	1283	0.150023
GO:0016757	transferase activity, transferring glycosyl groups	molecular_function	5	circRNA158(LOC111911063);circRNA262(LOC111917365);circRNA377(LOC111915143);circRNA57(LOC111897745);circRNA583(LOC111908040);circRNA606(LOC111882217);circRNA766(LOC111878490);circRNA935(LOC111901375)	8	305	23	1283	0.157022
GO:0009570	chloroplast stroma	cellular_component	12	circRNA114(LOC111896753);circRNA115(LOC111896753);circRNA116(LOC111896753);circRNA325(LOC111895989);circRNA363(LOC111902471);circRNA365(LOC111910617);circRNA452(LOC111893404);circRNA48(LOC111920386);circRNA568(LOC111882253);circRNA586(LOC111901950);circRNA618(LOC111884373);circRNA652(LOC111893968);circRNA704(LOC111907349);circRNA719(LOC111895632);circRNA730(LOC111920386);circRNA76(LOC111886111);c…	14	305	45	1283	0.158565
GO:0005829	cytosol	cellular_component	9	circRNA1176(LOC111881919);circRNA119(LOC111892154);circRNA1328(LOC111890618);circRNA1331(LOC111876416);circRNA152(LOC111895907);circRNA167(LOC111921257);circRNA209(LOC111898538);circRNA211(LOC111876920);circRNA233(LOC111915371);circRNA245(LOC111898305);circRNA271(LOC111882405);circRNA27(LOC111915463);circRNA28(LOC111916610);circRNA325(LOC111895989);circRNA358(LOC111913863);circRNA396(LOC111898893…	44	305	162	1283	0.162153
GO:0016301	kinase activity	molecular_function	6	circRNA102(LOC111889528);circRNA103(LOC111884224);circRNA120(LOC111904707);circRNA122(LOC111892623);circRNA1250(LOC111917198);circRNA168(LOC111894897);circRNA180(LOC111886177);circRNA184(LOC111889346);circRNA190(LOC111912867);circRNA257(LOC111880996);circRNA271(LOC111882405);circRNA34(LOC111906690);circRNA373(LOC111882285);circRNA402(LOC111905253);circRNA412(LOC111914158);circRNA778(LOC111904707)…	16	305	53	1283	0.16878
GO:0004672	protein kinase activity	molecular_function	7	circRNA120(LOC111904707);circRNA122(LOC111892623);circRNA1331(LOC111876416);circRNA247(LOC111905299);circRNA27(LOC111915463);circRNA34(LOC111906690);circRNA402(LOC111905253);circRNA439(LOC111920243);circRNA474(LOC111899648);circRNA522(LOC111915463);circRNA778(LOC111904707)	9	305	27	1283	0.169457
GO:0005887	integral component of plasma membrane	cellular_component	7	circRNA1109(LOC111913855);circRNA1291(LOC111905298);circRNA258(LOC111887164);circRNA273(LOC111885436);circRNA387(LOC111887675)	5	305	13	1283	0.175139
GO:0004712	protein serine/threonine/tyrosine kinase activity	molecular_function	8	circRNA257(LOC111880996);circRNA271(LOC111882405);circRNA27(LOC111915463);circRNA474(LOC111899648);circRNA522(LOC111915463)	4	305	10	1283	0.195436
GO:0016874	ligase activity	molecular_function	4	circRNA203(LOC111896959);circRNA366(LOC111890173);circRNA7(LOC111883380);circRNA96(LOC111890907)	4	305	10	1283	0.195436
GO:0030170	pyridoxal phosphate binding	molecular_function	6	circRNA325(LOC111895989);circRNA652(LOC111893968);circRNA993(LOC111902253);ciRNA40(LOC111890748)	4	305	10	1283	0.195436
GO:0006468	protein phosphorylation	biological_process	8	circRNA102(LOC111889528);circRNA103(LOC111884224);circRNA120(LOC111904707);circRNA122(LOC111892623);circRNA1250(LOC111917198);circRNA152(LOC111895907);circRNA184(LOC111889346);circRNA247(LOC111905299);circRNA257(LOC111880996);circRNA27(LOC111915463);circRNA34(LOC111906690);circRNA35(LOC111897124);circRNA402(LOC111905253);circRNA412(LOC111914158);circRNA439(LOC111920243);circRNA474(LOC111899648);c…	18	305	62	1283	0.197236
GO:0005886	plasma membrane	cellular_component	5	circRNA102(LOC111889528);circRNA103(LOC111884224);circRNA1196(LOC111915286);circRNA120(LOC111904707);circRNA122(LOC111892623);circRNA1250(LOC111917198);circRNA126(LOC111892165);circRNA12(LOC111890540);circRNA149(LOC111886137);circRNA155(LOC111911774);circRNA185(LOC111876585);circRNA186(LOC111876584);circRNA188(LOC111880132);circRNA189(LOC111880132);circRNA228(LOC111880154);circRNA236(LOC111914688…	51	305	194	1283	0.210104
GO:0045893	positive regulation of transcription, DNA-templated	biological_process	12	circRNA413(LOC111883669);circRNA553(LOC111909700);circRNA703(LOC111884655)	3	305	7	1283	0.218089
GO:0000398	mRNA splicing, via spliceosome	biological_process	11	circRNA104(LOC111894694);circRNA163(LOC111887406);circRNA167(LOC111921257);circRNA414(LOC111887406)	3	305	7	1283	0.218089
GO:0006633	fatty acid biosynthetic process	biological_process	9	circRNA112(LOC111878066);circRNA180(LOC111886177);circRNA376(LOC111915140)	3	305	7	1283	0.218089
GO:0004497	monooxygenase activity	molecular_function	5	circRNA333(LOC111903253);circRNA62(LOC111903253);circRNA662(LOC111902705);circRNA948(LOC111876869)	3	305	7	1283	0.218089
GO:0006631	fatty acid metabolic process	biological_process	9	circRNA112(LOC111878066);circRNA203(LOC111896959);circRNA285(LOC111878886)	3	305	7	1283	0.218089
GO:0008565	protein transporter activity	molecular_function	5	circRNA233(LOC111915371);circRNA246(LOC111877354);circRNA443(LOC111889597);circRNA545(LOC111876115);circRNA718(LOC111915452)	5	305	14	1283	0.222373
GO:0005215	transporter activity	molecular_function	3	circRNA272(LOC111882434);circRNA418(LOC111892811);circRNA500(LOC111882434);circRNA704(LOC111907349);circRNA849(LOC111896910);circRNA892(LOC111891116)	5	305	14	1283	0.222373
GO:0003674	molecular_function	molecular_function	2	circRNA111(LOC111912980);circRNA1174(LOC111892427);circRNA118(LOC111891401);circRNA119(LOC111892154);circRNA1208(LOC111877591);circRNA130(LOC111903326);circRNA18(LOC111884285);circRNA209(LOC111898538);circRNA21(LOC111919244);circRNA221(LOC111894830);circRNA244(LOC111915477);circRNA259(LOC111908173);circRNA282(LOC111878917);circRNA283(LOC111878917);circRNA292(LOC111879374);circRNA327(LOC111908728)…	34	305	127	1283	0.23152
GO:0010793	regulation of mRNA export from nucleus	biological_process	8	circRNA179(LOC111918716)	1	305	1	1283	0.237724
GO:0000307	cyclin-dependent protein kinase holoenzyme complex	cellular_component	7	circRNA494(LOC111909597)	1	305	1	1283	0.237724
GO:0031957	very long-chain fatty acid-CoA ligase activity	molecular_function	7	circRNA112(LOC111878066)	1	305	1	1283	0.237724
GO:0010289	homogalacturonan biosynthetic process	biological_process	10	circRNA766(LOC111878490)	1	305	1	1283	0.237724
GO:0000288	nuclear-transcribed mRNA catabolic process, deadenylation-dependent decay	biological_process	11	circRNA127(LOC111881148)	1	305	1	1283	0.237724
GO:0006535	cysteine biosynthetic process from serine	biological_process	10	ciRNA40(LOC111890748)	1	305	1	1283	0.237724
GO:0019750	chloroplast localization	biological_process	7	circRNA1160(LOC111896961)	1	305	1	1283	0.237724
GO:0080111	DNA demethylation	biological_process	11	circRNA196(LOC111898038)	1	305	1	1283	0.237724
GO:0003962	cystathionine gamma-synthase activity	molecular_function	6	circRNA652(LOC111893968)	1	305	1	1283	0.237724
GO:0006261	DNA-dependent DNA replication	biological_process	10	circRNA286(LOC111898181)	1	305	1	1283	0.237724
GO:0012510	trans-Golgi network transport vesicle membrane	cellular_component	13	circRNA271(LOC111882405)	1	305	1	1283	0.237724
GO:0009099	valine biosynthetic process	biological_process	9	ciRNA84(LOC111911663)	1	305	1	1283	0.237724
GO:0000164	protein phosphatase type 1 complex	cellular_component	9	circRNA792(LOC111907258)	1	305	1	1283	0.237724
GO:0051996	squalene synthase activity	molecular_function	8	circRNA748(LOC111887746)	1	305	1	1283	0.237724
GO:1900424	regulation of defense response to bacterium	biological_process	8	circRNA271(LOC111882405)	1	305	1	1283	0.237724
GO:0006972	hyperosmotic response	biological_process	6	circRNA1331(LOC111876416)	1	305	1	1283	0.237724
GO:0030497	fatty acid elongation	biological_process	10	ciRNA11(LOC111921286)	1	305	1	1283	0.237724
GO:0009561	megagametogenesis	biological_process	8	circRNA756(LOC111885992)	1	305	1	1283	0.237724
GO:0008195	phosphatidate phosphatase activity	molecular_function	8	circRNA108(LOC111885894)	1	305	1	1283	0.237724
GO:0005986	sucrose biosynthetic process	biological_process	8	circRNA1328(LOC111890618)	1	305	1	1283	0.237724
GO:0009097	isoleucine biosynthetic process	biological_process	9	ciRNA84(LOC111911663)	1	305	1	1283	0.237724
GO:0019104	DNA N-glycosylase activity	molecular_function	7	circRNA196(LOC111898038)	1	305	1	1283	0.237724
GO:0009647	skotomorphogenesis	biological_process	7	circRNA96(LOC111890907)	1	305	1	1283	0.237724
GO:0040007	growth	biological_process	3	circRNA86(LOC111885653);circRNA87(LOC111885653)	1	305	1	1283	0.237724
GO:0048312	intracellular distribution of mitochondria	biological_process	7	circRNA1047(LOC111893428);circRNA235(LOC111893428)	1	305	1	1283	0.237724
GO:0033926	glycopeptide alpha-N-acetylgalactosaminidase activity	molecular_function	7	circRNA4(LOC111890053)	1	305	1	1283	0.237724
GO:0006955	immune response	biological_process	4	circRNA86(LOC111885653);circRNA87(LOC111885653)	1	305	1	1283	0.237724
GO:0005798	Golgi-associated vesicle	cellular_component	11	circRNA656(LOC111907154);ciRNA17(LOC111907154)	1	305	1	1283	0.237724
GO:0004462	lactoylglutathione lyase activity	molecular_function	6	circRNA78(LOC111886089)	1	305	1	1283	0.237724
GO:0032927	positive regulation of activin receptor signaling pathway	biological_process	12	circRNA179(LOC111918716)	1	305	1	1283	0.237724
GO:0008559	xenobiotic-transporting ATPase activity	molecular_function	13	circRNA541(LOC111890855)	1	305	1	1283	0.237724
GO:0098655	cation transmembrane transport	biological_process	7	circRNA239(LOC111914709)	1	305	1	1283	0.237724
GO:0001676	long-chain fatty acid metabolic process	biological_process	10	circRNA285(LOC111878886)	1	305	1	1283	0.237724
GO:0009649	entrainment of circadian clock	biological_process	6	circRNA96(LOC111890907)	1	305	1	1283	0.237724
GO:0052655	L-valine transaminase activity	molecular_function	8	ciRNA84(LOC111911663)	1	305	1	1283	0.237724
GO:0043486	histone exchange	biological_process	10	circRNA902(LOC111916321)	1	305	1	1283	0.237724
GO:0005779	integral component of peroxisomal membrane	cellular_component	14	circRNA170(LOC111892874)	1	305	1	1283	0.237724
GO:0000184	nuclear-transcribed mRNA catabolic process, nonsense-mediated decay	biological_process	11	circRNA245(LOC111898305)	1	305	1	1283	0.237724
GO:0050373	UDP-arabinose 4-epimerase activity	molecular_function	7	circRNA229(LOC111893505);circRNA230(LOC111893505);circRNA465(LOC111893505)	1	305	1	1283	0.237724
GO:0070064	proline-rich region binding	molecular_function	5	circRNA15(LOC111909092)	1	305	1	1283	0.237724
GO:0008158	hedgehog receptor activity	molecular_function	6	circRNA149(LOC111886137);circRNA614(LOC111886137)	1	305	1	1283	0.237724
GO:0010076	maintenance of floral meristem identity	biological_process	11	circRNA413(LOC111883669)	1	305	1	1283	0.237724
GO:0004749	ribose phosphate diphosphokinase activity	molecular_function	7	circRNA373(LOC111882285)	1	305	1	1283	0.237724
GO:0019904	protein domain specific binding	molecular_function	5	circRNA452(LOC111893404)	1	305	1	1283	0.237724
GO:0016050	vesicle organization	biological_process	5	circRNA889(LOC111879838)	1	305	1	1283	0.237724
GO:0010162	seed dormancy process	biological_process	6	circRNA366(LOC111890173)	1	305	1	1283	0.237724
GO:0005929	cilium	cellular_component	6	circRNA869(LOC111892542)	1	305	1	1283	0.237724
GO:0010268	brassinosteroid homeostasis	biological_process	8	circRNA948(LOC111876869)	1	305	1	1283	0.237724
GO:0046939	nucleotide phosphorylation	biological_process	10	circRNA571(LOC111921492)	1	305	1	1283	0.237724
GO:0042406	extrinsic component of endoplasmic reticulum membrane	cellular_component	12	circRNA168(LOC111894897)	1	305	1	1283	0.237724
GO:0034063	stress granule assembly	biological_process	6	circRNA1013(LOC111910334)	1	305	1	1283	0.237724
GO:0003989	acetyl-CoA carboxylase activity	molecular_function	7	ciRNA11(LOC111921286)	1	305	1	1283	0.237724
GO:0045737	positive regulation of cyclin-dependent protein serine/threonine kinase activity	biological_process	13	circRNA494(LOC111909597)	1	305	1	1283	0.237724
GO:0042937	tripeptide transporter activity	molecular_function	7	circRNA418(LOC111892811)	1	305	1	1283	0.237724
GO:0032543	mitochondrial translation	biological_process	8	circRNA363(LOC111902471)	1	305	1	1283	0.237724
GO:0004742	dihydrolipoyllysine-residue acetyltransferase activity	molecular_function	9	circRNA834(LOC111910329)	1	305	1	1283	0.237724
GO:0008094	DNA-dependent ATPase activity	molecular_function	11	circRNA42(LOC111902664)	1	305	1	1283	0.237724
GO:0004709	MAP kinase kinase kinase activity	molecular_function	10	circRNA271(LOC111882405)	1	305	1	1283	0.237724
GO:0032012	regulation of ARF protein signal transduction	biological_process	11	circRNA86(LOC111885653);circRNA87(LOC111885653)	1	305	1	1283	0.237724
GO:0009664	plant-type cell wall organization	biological_process	6	circRNA1250(LOC111917198)	1	305	1	1283	0.237724
GO:0048438	floral whorl development	biological_process	5	circRNA413(LOC111883669)	1	305	1	1283	0.237724
GO:0009081	branched-chain amino acid metabolic process	biological_process	7	ciRNA84(LOC111911663)	1	305	1	1283	0.237724
GO:0004817	cysteine-tRNA ligase activity	molecular_function	8	circRNA666(LOC111894410)	1	305	1	1283	0.237724
GO:0030173	integral component of Golgi membrane	cellular_component	13	circRNA13(LOC111881361)	1	305	1	1283	0.237724
GO:0010928	regulation of auxin mediated signaling pathway	biological_process	9	circRNA1196(LOC111915286)	1	305	1	1283	0.237724
GO:0009620	response to fungus	biological_process	7	circRNA271(LOC111882405)	1	305	1	1283	0.237724
GO:0071345	cellular response to cytokine stimulus	biological_process	7	circRNA822(LOC111914121)	1	305	1	1283	0.237724
GO:0070412	R-SMAD binding	molecular_function	6	circRNA179(LOC111918716)	1	305	1	1283	0.237724
GO:0001103	RNA polymerase II repressing transcription factor binding	molecular_function	7	circRNA15(LOC111909092)	1	305	1	1283	0.237724
GO:0010291	carotene beta-ring hydroxylase activity	molecular_function	6	circRNA915(LOC111886576)	1	305	1	1283	0.237724
GO:0004084	branched-chain-amino-acid transaminase activity	molecular_function	7	ciRNA84(LOC111911663)	1	305	1	1283	0.237724
GO:0046863	ribulose-1,5-bisphosphate carboxylase/oxygenase activator activity	molecular_function	5	circRNA365(LOC111910617)	1	305	1	1283	0.237724
GO:0034755	iron ion transmembrane transport	biological_process	7	circRNA272(LOC111882434);circRNA500(LOC111882434)	1	305	1	1283	0.237724
GO:0006336	DNA replication-independent nucleosome assembly	biological_process	13	circRNA488(LOC111886161);circRNA663(LOC111886161)	1	305	1	1283	0.237724
GO:0009165	nucleotide biosynthetic process	biological_process	9	circRNA373(LOC111882285)	1	305	1	1283	0.237724
GO:0030100	regulation of endocytosis	biological_process	6	circRNA751(LOC111886844)	1	305	1	1283	0.237724
GO:0008053	mitochondrial fusion	biological_process	6	circRNA1047(LOC111893428);circRNA235(LOC111893428)	1	305	1	1283	0.237724
GO:0009052	pentose-phosphate shunt, non-oxidative branch	biological_process	15	circRNA1099(LOC111905483)	1	305	1	1283	0.237724
GO:0080005	photosystem stoichiometry adjustment	biological_process	7	circRNA359(LOC111892130)	1	305	1	1283	0.237724
GO:0030015	CCR4-NOT core complex	cellular_component	8	circRNA127(LOC111881148)	1	305	1	1283	0.237724
GO:0009640	photomorphogenesis	biological_process	7	circRNA96(LOC111890907)	1	305	1	1283	0.237724
GO:0009086	methionine biosynthetic process	biological_process	9	circRNA652(LOC111893968)	1	305	1	1283	0.237724
GO:0010582	floral meristem determinacy	biological_process	5	circRNA413(LOC111883669)	1	305	1	1283	0.237724
GO:0006617	SRP-dependent cotranslational protein targeting to membrane, signal sequence recognition	biological_process	10	circRNA396(LOC111898893)	1	305	1	1283	0.237724
GO:0008878	glucose-1-phosphate adenylyltransferase activity	molecular_function	8	circRNA114(LOC111896753);circRNA115(LOC111896753);circRNA116(LOC111896753)	1	305	1	1283	0.237724
GO:0051177	meiotic sister chromatid cohesion	biological_process	8	circRNA287(LOC111880206)	1	305	1	1283	0.237724
GO:0005324	long-chain fatty acid transporter activity	molecular_function	7	circRNA376(LOC111915140)	1	305	1	1283	0.237724
GO:0042939	tripeptide transport	biological_process	8	circRNA418(LOC111892811)	1	305	1	1283	0.237724
GO:0055046	microgametogenesis	biological_process	8	circRNA756(LOC111885992)	1	305	1	1283	0.237724
GO:0050567	glutaminyl-tRNA synthase (glutamine-hydrolyzing) activity	molecular_function	7	circRNA363(LOC111902471)	1	305	1	1283	0.237724
GO:0030234	enzyme regulator activity	molecular_function	3	circRNA365(LOC111910617)	1	305	1	1283	0.237724
GO:0034508	centromere complex assembly	biological_process	6	circRNA287(LOC111880206)	1	305	1	1283	0.237724
GO:0032544	plastid translation	biological_process	8	circRNA762(LOC111886410)	1	305	1	1283	0.237724
GO:0022821	potassium ion antiporter activity	molecular_function	8	circRNA155(LOC111911774)	1	305	1	1283	0.237724
GO:0030586	[methionine synthase] reductase activity	molecular_function	7	ciRNA41(LOC111909603)	1	305	1	1283	0.237724
GO:0019567	arabinose biosynthetic process	biological_process	9	circRNA229(LOC111893505);circRNA230(LOC111893505);circRNA465(LOC111893505)	1	305	1	1283	0.237724
GO:0016706	oxidoreductase activity, acting on paired donors, with incorporation or reduction of molecular oxygen, 2-oxoglutarate as one donor, and incorporation of one atom each of oxygen into both donors	molecular_function	6	circRNA26(LOC111915462)	1	305	1	1283	0.237724
GO:0009569	chloroplast starch grain	cellular_component	12	circRNA158(LOC111911063)	1	305	1	1283	0.237724
GO:0048255	mRNA stabilization	biological_process	11	circRNA1035(LOC111877918);circRNA213(LOC111877918)	1	305	1	1283	0.237724
GO:0008601	protein phosphatase type 2A regulator activity	molecular_function	6	circRNA493(LOC111894376)	1	305	1	1283	0.237724
GO:0042760	very long-chain fatty acid catabolic process	biological_process	10	circRNA376(LOC111915140)	1	305	1	1283	0.237724
GO:0000165	MAPK cascade	biological_process	9	circRNA271(LOC111882405)	1	305	1	1283	0.237724
GO:2001295	malonyl-CoA biosynthetic process	biological_process	12	ciRNA11(LOC111921286)	1	305	1	1283	0.237724
GO:0045298	tubulin complex	cellular_component	11	circRNA542(LOC111900571)	1	305	1	1283	0.237724
GO:0048500	signal recognition particle	cellular_component	9	circRNA396(LOC111898893)	1	305	1	1283	0.237724
GO:0033840	NDP-glucose-starch glucosyltransferase activity	molecular_function	8	circRNA158(LOC111911063)	1	305	1	1283	0.237724
GO:0071011	precatalytic spliceosome	cellular_component	9	circRNA163(LOC111887406);circRNA414(LOC111887406)	1	305	1	1283	0.237724
GO:0004839	ubiquitin activating enzyme activity	molecular_function	7	circRNA505(LOC111908577)	1	305	1	1283	0.237724
GO:0044238	primary metabolic process	biological_process	4	circRNA48(LOC111920386);circRNA730(LOC111920386)	1	305	1	1283	0.237724
GO:0045330	aspartyl esterase activity	molecular_function	6	circRNA147(LOC111883025)	1	305	1	1283	0.237724
GO:0031901	early endosome membrane	cellular_component	11	circRNA86(LOC111885653);circRNA87(LOC111885653)	1	305	1	1283	0.237724
GO:0005085	guanyl-nucleotide exchange factor activity	molecular_function	3	circRNA86(LOC111885653);circRNA87(LOC111885653)	1	305	1	1283	0.237724
GO:0080188	RNA-directed DNA methylation	biological_process	12	circRNA142(LOC111913556);circRNA401(LOC111913556)	1	305	1	1283	0.237724
GO:0009641	shade avoidance	biological_process	8	circRNA96(LOC111890907)	1	305	1	1283	0.237724
GO:0070009	serine-type aminopeptidase activity	molecular_function	9	circRNA503(LOC111910042)	1	305	1	1283	0.237724
GO:0005978	glycogen biosynthetic process	biological_process	9	circRNA114(LOC111896753);circRNA115(LOC111896753);circRNA116(LOC111896753)	1	305	1	1283	0.237724
GO:0010220	positive regulation of vernalization response	biological_process	8	circRNA413(LOC111883669)	1	305	1	1283	0.237724
GO:0052656	L-isoleucine transaminase activity	molecular_function	8	ciRNA84(LOC111911663)	1	305	1	1283	0.237724
GO:2000034	regulation of seed maturation	biological_process	7	circRNA360(LOC111878746)	1	305	1	1283	0.237724
GO:0010239	chloroplast mRNA processing	biological_process	11	circRNA519(LOC111879288);circRNA702(LOC111879288)	1	305	1	1283	0.237724
GO:0004652	polynucleotide adenylyltransferase activity	molecular_function	8	circRNA281(LOC111900081)	1	305	1	1283	0.237724
GO:0061512	protein localization to cilium	biological_process	8	circRNA869(LOC111892542)	1	305	1	1283	0.237724
GO:0033523	histone H2B ubiquitination	biological_process	10	circRNA366(LOC111890173)	1	305	1	1283	0.237724
GO:0071470	cellular response to osmotic stress	biological_process	6	circRNA91(LOC111893949)	1	305	1	1283	0.237724
GO:0016820	hydrolase activity, acting on acid anhydrides, catalyzing transmembrane movement of substances	molecular_function	6	circRNA491(LOC111895660)	1	305	1	1283	0.237724
GO:0016246	RNA interference	biological_process	11	circRNA245(LOC111898305)	1	305	1	1283	0.237724
GO:0002184	cytoplasmic translational termination	biological_process	9	circRNA762(LOC111886410)	1	305	1	1283	0.237724
GO:0015910	peroxisomal long-chain fatty acid import	biological_process	12	circRNA376(LOC111915140)	1	305	1	1283	0.237724
GO:0043023	ribosomal large subunit binding	molecular_function	5	circRNA762(LOC111886410)	1	305	1	1283	0.237724
GO:0090333	regulation of stomatal closure	biological_process	7	circRNA155(LOC111911774)	1	305	1	1283	0.237724
GO:0046873	metal ion transmembrane transporter activity	molecular_function	9	circRNA239(LOC111914709)	1	305	1	1283	0.237724
GO:0031936	negative regulation of chromatin silencing	biological_process	13	circRNA196(LOC111898038)	1	305	1	1283	0.237724
GO:0009966	regulation of signal transduction	biological_process	7	circRNA90(LOC111899395)	1	305	1	1283	0.237724
GO:0042281	dolichyl pyrophosphate Man9GlcNAc2 alpha-1,3-glucosyltransferase activity	molecular_function	8	circRNA269(LOC111917918)	1	305	1	1283	0.237724
GO:0030956	glutamyl-tRNA(Gln) amidotransferase complex	cellular_component	7	circRNA363(LOC111902471)	1	305	1	1283	0.237724
GO:1901409	positive regulation of phosphorylation of RNA polymerase II C-terminal domain	biological_process	15	circRNA494(LOC111909597)	1	305	1	1283	0.237724
GO:0006432	phenylalanyl-tRNA aminoacylation	biological_process	13	circRNA601(LOC111900173)	1	305	1	1283	0.237724
GO:0004124	cysteine synthase activity	molecular_function	6	ciRNA40(LOC111890748)	1	305	1	1283	0.237724
GO:0071258	cellular response to gravity	biological_process	6	circRNA542(LOC111900571)	1	305	1	1283	0.237724
GO:0070042	rRNA (uridine-N3-)-methyltransferase activity	molecular_function	8	circRNA1335(LOC111892996)	1	305	1	1283	0.237724
GO:0006607	NLS-bearing protein import into nucleus	biological_process	7	circRNA233(LOC111915371)	1	305	1	1283	0.237724
GO:0010275	NAD(P)H dehydrogenase complex assembly	biological_process	9	circRNA568(LOC111882253)	1	305	1	1283	0.237724
GO:0086010	membrane depolarization during action potential	biological_process	7	circRNA484(LOC111899920)	1	305	1	1283	0.237724
GO:0018401	peptidyl-proline hydroxylation to 4-hydroxy-L-proline	biological_process	9	circRNA26(LOC111915462)	1	305	1	1283	0.237724
GO:0004103	choline kinase activity	molecular_function	7	circRNA361(LOC111921655)	1	305	1	1283	0.237724
GO:0071461	cellular response to redox state	biological_process	5	circRNA359(LOC111892130)	1	305	1	1283	0.237724
GO:0004373	glycogen (starch) synthase activity	molecular_function	8	circRNA158(LOC111911063)	1	305	1	1283	0.237724
GO:0043087	regulation of GTPase activity	biological_process	14	circRNA699(LOC111915330)	1	305	1	1283	0.237724
GO:0046539	histamine N-methyltransferase activity	molecular_function	8	circRNA216(LOC111913013)	1	305	1	1283	0.237724
GO:0080147	root hair cell development	biological_process	11	circRNA606(LOC111882217)	1	305	1	1283	0.237724
GO:0045254	pyruvate dehydrogenase complex	cellular_component	9	circRNA834(LOC111910329)	1	305	1	1283	0.237724
GO:0045227	capsule polysaccharide biosynthetic process	biological_process	9	circRNA229(LOC111893505);circRNA230(LOC111893505);circRNA465(LOC111893505)	1	305	1	1283	0.237724
GO:0005381	iron ion transmembrane transporter activity	molecular_function	11	circRNA272(LOC111882434);circRNA500(LOC111882434)	1	305	1	1283	0.237724
GO:0004310	farnesyl-diphosphate farnesyltransferase activity	molecular_function	8	circRNA748(LOC111887746)	1	305	1	1283	0.237724
GO:0000183	chromatin silencing at rDNA	biological_process	14	circRNA182(LOC111886220)	1	305	1	1283	0.237724
GO:0004075	biotin carboxylase activity	molecular_function	6	ciRNA11(LOC111921286)	1	305	1	1283	0.237724
GO:0006879	cellular iron ion homeostasis	biological_process	11	circRNA272(LOC111882434);circRNA500(LOC111882434)	1	305	1	1283	0.237724
GO:0003906	DNA-(apurinic or apyrimidinic site) lyase activity	molecular_function	9	circRNA196(LOC111898038)	1	305	1	1283	0.237724
GO:0015450	P-P-bond-hydrolysis-driven protein transmembrane transporter activity	molecular_function	8	circRNA1160(LOC111896961)	1	305	1	1283	0.237724
GO:0008139	nuclear localization sequence binding	molecular_function	7	circRNA233(LOC111915371)	1	305	1	1283	0.237724
GO:0043481	anthocyanin accumulation in tissues in response to UV light	biological_process	7	circRNA1370(LOC111884458)	1	305	1	1283	0.237724
GO:0042545	cell wall modification	biological_process	6	circRNA147(LOC111883025)	1	305	1	1283	0.237724
GO:0004306	ethanolamine-phosphate cytidylyltransferase activity	molecular_function	8	circRNA547(LOC111888552)	1	305	1	1283	0.237724
GO:0005388	calcium-transporting ATPase activity	molecular_function	15	circRNA1109(LOC111913855)	1	305	1	1283	0.237724
GO:0019201	nucleotide kinase activity	molecular_function	8	circRNA571(LOC111921492)	1	305	1	1283	0.237724
GO:0006423	cysteinyl-tRNA aminoacylation	biological_process	13	circRNA666(LOC111894410)	1	305	1	1283	0.237724
GO:0015629	actin cytoskeleton	cellular_component	10	circRNA15(LOC111909092)	1	305	1	1283	0.237724
GO:0031426	polycistronic mRNA processing	biological_process	11	circRNA519(LOC111879288);circRNA702(LOC111879288)	1	305	1	1283	0.237724
GO:0019941	modification-dependent protein catabolic process	biological_process	8	circRNA505(LOC111908577)	1	305	1	1283	0.237724
GO:0033358	UDP-L-arabinose biosynthetic process	biological_process	11	circRNA229(LOC111893505);circRNA230(LOC111893505);circRNA465(LOC111893505)	1	305	1	1283	0.237724
GO:0001887	selenium compound metabolic process	biological_process	5	circRNA652(LOC111893968)	1	305	1	1283	0.237724
GO:0030427	site of polarized growth	cellular_component	5	circRNA1196(LOC111915286)	1	305	1	1283	0.237724
GO:0007143	female meiotic division	biological_process	6	circRNA756(LOC111885992)	1	305	1	1283	0.237724
GO:0030904	retromer complex	cellular_component	6	circRNA718(LOC111915452)	1	305	1	1283	0.237724
GO:0002229	defense response to oomycetes	biological_process	7	circRNA271(LOC111882405)	1	305	1	1283	0.237724
GO:0031167	rRNA methylation	biological_process	13	circRNA1011(LOC111902027)	1	305	1	1283	0.237724
GO:0003978	UDP-glucose 4-epimerase activity	molecular_function	7	circRNA229(LOC111893505);circRNA230(LOC111893505);circRNA465(LOC111893505)	1	305	1	1283	0.237724
GO:0009722	detection of cytokinin stimulus	biological_process	7	circRNA822(LOC111914121)	1	305	1	1283	0.237724
GO:0005731	nucleolus organizer region	cellular_component	15	circRNA756(LOC111885992)	1	305	1	1283	0.237724
GO:0016226	iron-sulfur cluster assembly	biological_process	5	circRNA704(LOC111907349)	1	305	1	1283	0.237724
GO:0070475	rRNA base methylation	biological_process	14	circRNA1335(LOC111892996)	1	305	1	1283	0.237724
GO:0005319	lipid transporter activity	molecular_function	5	circRNA149(LOC111886137);circRNA614(LOC111886137)	1	305	1	1283	0.237724
GO:0016132	brassinosteroid biosynthetic process	biological_process	6	circRNA948(LOC111876869)	1	305	1	1283	0.237724
GO:0008168	methyltransferase activity	molecular_function	6	circRNA1011(LOC111902027)	1	305	1	1283	0.237724
GO:0032039	integrator complex	cellular_component	11	circRNA482(LOC111890328)	1	305	1	1283	0.237724
GO:0002183	cytoplasmic translational initiation	biological_process	9	circRNA801(LOC111876651)	1	305	1	1283	0.237724
GO:0003887	DNA-directed DNA polymerase activity	molecular_function	8	circRNA286(LOC111898181)	1	305	1	1283	0.237724
GO:0006807	nitrogen compound metabolic process	biological_process	4	circRNA418(LOC111892811)	1	305	1	1283	0.237724
GO:0042644	chloroplast nucleoid	cellular_component	13	circRNA519(LOC111879288);circRNA702(LOC111879288)	1	305	1	1283	0.237724
GO:0043562	cellular response to nitrogen levels	biological_process	8	circRNA180(LOC111886177)	1	305	1	1283	0.237724
GO:0042325	regulation of phosphorylation	biological_process	8	circRNA493(LOC111894376)	1	305	1	1283	0.237724
GO:0019684	photosynthesis, light reaction	biological_process	6	circRNA618(LOC111884373)	1	305	1	1283	0.237724
GO:0052654	L-leucine transaminase activity	molecular_function	8	ciRNA84(LOC111911663)	1	305	1	1283	0.237724
GO:0097602	cullin family protein binding	molecular_function	5	circRNA6(LOC111907976)	1	305	1	1283	0.237724
GO:0031593	polyubiquitin binding	molecular_function	7	circRNA46(LOC111911243)	1	305	1	1283	0.237724
GO:0031935	regulation of chromatin silencing	biological_process	12	circRNA142(LOC111913556);circRNA401(LOC111913556)	1	305	1	1283	0.237724
GO:0006614	SRP-dependent cotranslational protein targeting to membrane	biological_process	9	circRNA396(LOC111898893)	1	305	1	1283	0.237724
GO:0009672	auxin:proton symporter activity	molecular_function	9	circRNA707(LOC111915996)	1	305	1	1283	0.237724
GO:0004096	catalase activity	molecular_function	7	circRNA453(LOC111878431)	1	305	1	1283	0.237724
GO:0000060	protein import into nucleus, translocation	biological_process	7	circRNA413(LOC111883669)	1	305	1	1283	0.237724
GO:0003724	RNA helicase activity	molecular_function	10	circRNA245(LOC111898305)	1	305	1	1283	0.237724
GO:0006987	activation of signaling protein activity involved in unfolded protein response	biological_process	10	circRNA168(LOC111894897)	1	305	1	1283	0.237724
GO:0004826	phenylalanine-tRNA ligase activity	molecular_function	8	circRNA601(LOC111900173)	1	305	1	1283	0.237724
GO:0005245	voltage-gated calcium channel activity	molecular_function	11	circRNA484(LOC111899920)	1	305	1	1283	0.237724
GO:0009834	plant-type secondary cell wall biogenesis	biological_process	7	circRNA935(LOC111901375)	1	305	1	1283	0.237724
GO:0010390	histone monoubiquitination	biological_process	10	circRNA366(LOC111890173)	1	305	1	1283	0.237724
GO:0007140	male meiosis	biological_process	6	circRNA756(LOC111885992)	1	305	1	1283	0.237724
GO:0016180	snRNA processing	biological_process	11	circRNA482(LOC111890328)	1	305	1	1283	0.237724
GO:0006384	transcription initiation from RNA polymerase III promoter	biological_process	10	circRNA416(LOC111905529)	1	305	1	1283	0.237724
GO:0016123	xanthophyll biosynthetic process	biological_process	10	circRNA915(LOC111886576)	1	305	1	1283	0.237724
GO:0006505	GPI anchor metabolic process	biological_process	10	circRNA319(LOC111883268)	1	305	1	1283	0.237724
GO:0031409	pigment binding	molecular_function	4	ciRNA8(LOC111878096)	1	305	1	1283	0.237724
GO:0005200	structural constituent of cytoskeleton	molecular_function	4	circRNA542(LOC111900571)	1	305	1	1283	0.237724
GO:0031119	tRNA pseudouridine synthesis	biological_process	13	circRNA1118(LOC111891533)	1	305	1	1283	0.237724
GO:0009768	photosynthesis, light harvesting in photosystem I	biological_process	7	ciRNA8(LOC111878096)	1	305	1	1283	0.237724
GO:0000285	1-phosphatidylinositol-3-phosphate 5-kinase activity	molecular_function	8	circRNA243(LOC111909829)	1	305	1	1283	0.237724
GO:0090153	regulation of sphingolipid biosynthetic process	biological_process	8	circRNA149(LOC111886137);circRNA614(LOC111886137)	1	305	1	1283	0.237724
GO:0050790	regulation of catalytic activity	biological_process	5	circRNA86(LOC111885653);circRNA87(LOC111885653)	1	305	1	1283	0.237724
GO:0031428	box C/D snoRNP complex	cellular_component	9	circRNA163(LOC111887406);circRNA414(LOC111887406)	1	305	1	1283	0.237724
GO:0008253	5'-nucleotidase activity	molecular_function	9	circRNA275(LOC111881718)	1	305	1	1283	0.237724
GO:2000060	positive regulation of protein ubiquitination involved in ubiquitin-dependent protein catabolic process	biological_process	12	circRNA6(LOC111907976)	1	305	1	1283	0.237724
GO:0030127	COPII vesicle coat	cellular_component	11	circRNA849(LOC111896910)	1	305	1	1283	0.237724
GO:0000281	mitotic cytokinesis	biological_process	7	circRNA1047(LOC111893428);circRNA235(LOC111893428)	1	305	1	1283	0.237724
GO:0009788	negative regulation of abscisic acid-activated signaling pathway	biological_process	10	circRNA271(LOC111882405)	1	305	1	1283	0.237724
GO:0000152	nuclear ubiquitin ligase complex	cellular_component	8	circRNA96(LOC111890907)	1	305	1	1283	0.237724
GO:0048578	positive regulation of long-day photoperiodism, flowering	biological_process	8	circRNA703(LOC111884655)	1	305	1	1283	0.237724
GO:0090332	stomatal closure	biological_process	6	circRNA111(LOC111912980)	1	305	1	1283	0.237724
GO:0046540	U4/U6 x U5 tri-snRNP complex	cellular_component	9	circRNA163(LOC111887406);circRNA414(LOC111887406)	1	305	1	1283	0.237724
GO:0001046	core promoter sequence-specific DNA binding	molecular_function	10	circRNA512(LOC111906077)	1	305	1	1283	0.237724
GO:0006284	base-excision repair	biological_process	10	circRNA196(LOC111898038)	1	305	1	1283	0.237724
GO:0010077	maintenance of inflorescence meristem identity	biological_process	11	circRNA413(LOC111883669)	1	305	1	1283	0.237724
GO:0033169	histone H3-K9 demethylation	biological_process	12	circRNA756(LOC111885992)	1	305	1	1283	0.237724
GO:0010102	lateral root morphogenesis	biological_process	9	circRNA289(LOC111906099)	1	305	1	1283	0.237724
GO:0008312	7S RNA binding	molecular_function	7	circRNA396(LOC111898893)	1	305	1	1283	0.237724
GO:0004679	AMP-activated protein kinase activity	molecular_function	9	circRNA180(LOC111886177)	1	305	1	1283	0.237724
GO:0005315	inorganic phosphate transmembrane transporter activity	molecular_function	7	circRNA270(LOC111887307);circRNA498(LOC111887307)	1	305	1	1283	0.237724
GO:0005086	ARF guanyl-nucleotide exchange factor activity	molecular_function	4	circRNA86(LOC111885653);circRNA87(LOC111885653)	1	305	1	1283	0.237724
GO:0048354	mucilage biosynthetic process involved in seed coat development	biological_process	7	circRNA606(LOC111882217)	1	305	1	1283	0.237724
GO:0009116	nucleoside metabolic process	biological_process	8	circRNA373(LOC111882285)	1	305	1	1283	0.237724
GO:0000126	transcription factor TFIIIB complex	cellular_component	10	circRNA416(LOC111905529)	1	305	1	1283	0.237724
GO:0010603	regulation of cytoplasmic mRNA processing body assembly	biological_process	7	circRNA1013(LOC111910334)	1	305	1	1283	0.237724
GO:0070681	glutaminyl-tRNAGln biosynthesis via transamidation	biological_process	12	circRNA363(LOC111902471)	1	305	1	1283	0.237724
GO:0004751	ribose-5-phosphate isomerase activity	molecular_function	7	circRNA1099(LOC111905483)	1	305	1	1283	0.237724
GO:0045309	protein phosphorylated amino acid binding	molecular_function	6	circRNA452(LOC111893404)	1	305	1	1283	0.237724
GO:0008409	5'-3' exonuclease activity	molecular_function	8	circRNA286(LOC111898181)	1	305	1	1283	0.237724
GO:0010143	cutin biosynthetic process	biological_process	7	circRNA112(LOC111878066)	1	305	1	1283	0.237724
GO:0045010	actin nucleation	biological_process	12	circRNA175(LOC111894597);circRNA553(LOC111909700)	2	305	4	1283	0.240996
GO:0005769	early endosome	cellular_component	10	circRNA271(LOC111882405);circRNA86(LOC111885653);circRNA87(LOC111885653)	2	305	4	1283	0.240996
GO:0000122	negative regulation of transcription from RNA polymerase II promoter	biological_process	12	circRNA15(LOC111909092);circRNA299(LOC111901150)	2	305	4	1283	0.240996
GO:0003729	mRNA binding	molecular_function	8	circRNA396(LOC111898893);circRNA91(LOC111893949)	2	305	4	1283	0.240996
GO:0010090	trichome morphogenesis	biological_process	8	circRNA175(LOC111894597);circRNA553(LOC111909700)	2	305	4	1283	0.240996
GO:0008299	isoprenoid biosynthetic process	biological_process	6	circRNA468(LOC111900486);circRNA748(LOC111887746)	2	305	4	1283	0.240996
GO:0016760	cellulose synthase (UDP-forming) activity	molecular_function	8	circRNA583(LOC111908040);circRNA935(LOC111901375)	2	305	4	1283	0.240996
GO:0031209	SCAR complex	cellular_component	9	circRNA175(LOC111894597);circRNA553(LOC111909700)	2	305	4	1283	0.240996
GO:0032259	methylation	biological_process	4	circRNA106(LOC111882643);circRNA216(LOC111913013)	2	305	4	1283	0.240996
GO:0046982	protein heterodimerization activity	molecular_function	6	circRNA413(LOC111883669);circRNA427(LOC111886967)	2	305	4	1283	0.240996
GO:0003714	transcription corepressor activity	molecular_function	6	circRNA123(LOC111892588);circRNA440(LOC111921388)	2	305	4	1283	0.240996
GO:0016485	protein processing	biological_process	7	circRNA211(LOC111876920);circRNA9(LOC111901177)	2	305	4	1283	0.240996
GO:0016759	cellulose synthase activity	molecular_function	8	circRNA583(LOC111908040);circRNA935(LOC111901375)	2	305	4	1283	0.240996
GO:0044822	poly(A) RNA binding	molecular_function	7	circRNA1013(LOC111910334);circRNA15(LOC111909092)	2	305	4	1283	0.240996
GO:0009654	photosystem II oxygen evolving complex	cellular_component	10	circRNA586(LOC111901950);circRNA618(LOC111884373)	2	305	4	1283	0.240996
GO:0005525	GTP binding	molecular_function	9	circRNA1160(LOC111896961);circRNA1196(LOC111915286);circRNA126(LOC111892165);circRNA396(LOC111898893)	4	305	11	1283	0.252848
GO:0003924	GTPase activity	molecular_function	9	circRNA109(LOC111901567);circRNA110(LOC111901567);circRNA1160(LOC111896961);circRNA1196(LOC111915286);circRNA126(LOC111892165);circRNA396(LOC111898893);circRNA93(LOC111918008)	6	305	19	1283	0.285718
GO:0009737	response to abscisic acid	biological_process	6	circRNA102(LOC111889528);circRNA1328(LOC111890618);circRNA297(LOC111887279);circRNA358(LOC111913863);circRNA360(LOC111878746);circRNA683(LOC111887277)	6	305	19	1283	0.285718
GO:0030246	carbohydrate binding	molecular_function	4	circRNA358(LOC111913863);circRNA606(LOC111882217);circRNA650(LOC111915367)	3	305	8	1283	0.290828
GO:0055085	transmembrane transport	biological_process	5	circRNA345(LOC111884945);circRNA376(LOC111915140);circRNA707(LOC111915996)	3	305	8	1283	0.290828
GO:0005634	nucleus	cellular_component	9	circRNA101(LOC111915859);circRNA111(LOC111912980);circRNA112(LOC111878066);circRNA1176(LOC111881919);circRNA1196(LOC111915286);circRNA119(LOC111892154);circRNA123(LOC111892588);circRNA1296(LOC111894423);circRNA1328(LOC111890618);circRNA136(LOC111920529);circRNA1370(LOC111884458);circRNA142(LOC111913556);circRNA160(LOC111912183);circRNA167(LOC111921257);circRNA169(LOC111919020);circRNA172(LOC11187…	98	305	394	1283	0.291579
GO:0009579	thylakoid	cellular_component	7	circRNA365(LOC111910617);circRNA586(LOC111901950);circRNA618(LOC111884373);circRNA76(LOC111886111);circRNA77(LOC111886111)	4	305	12	1283	0.31311
GO:0006457	protein folding	biological_process	7	circRNA22(LOC111906903);circRNA683(LOC111887277);circRNA76(LOC111886111);circRNA77(LOC111886111);circRNA951(LOC111892922)	4	305	12	1283	0.31311
GO:0009658	chloroplast organization	biological_process	6	circRNA27(LOC111915463);circRNA474(LOC111899648);circRNA522(LOC111915463);circRNA76(LOC111886111);circRNA77(LOC111886111);circRNA788(LOC111901931)	4	305	12	1283	0.31311
GO:0009416	response to light stimulus	biological_process	6	circRNA325(LOC111895989);circRNA365(LOC111910617);circRNA822(LOC111914121);ciRNA8(LOC111878096)	4	305	12	1283	0.31311
GO:0009506	plasmodesma	cellular_component	5	circRNA102(LOC111889528);circRNA112(LOC111878066);circRNA142(LOC111913556);circRNA149(LOC111886137);circRNA236(LOC111914688);circRNA237(LOC111914688);circRNA238(LOC111914688);circRNA245(LOC111898305);circRNA34(LOC111906690);circRNA35(LOC111897124);circRNA401(LOC111913556);circRNA418(LOC111892811);circRNA427(LOC111886967);circRNA437(LOC111884518);circRNA439(LOC111920243);circRNA542(LOC111900571);c…	15	305	55	1283	0.31512
GO:0016310	phosphorylation	biological_process	7	circRNA120(LOC111904707);circRNA1250(LOC111917198);circRNA180(LOC111886177);circRNA184(LOC111889346);circRNA361(LOC111921655);circRNA373(LOC111882285);circRNA412(LOC111914158);circRNA778(LOC111904707)	7	305	24	1283	0.337711
GO:0045944	positive regulation of transcription from RNA polymerase II promoter	biological_process	13	circRNA494(LOC111909597);circRNA89(LOC111911751)	2	305	5	1283	0.341266
GO:0031977	thylakoid lumen	cellular_component	9	circRNA586(LOC111901950);circRNA618(LOC111884373)	2	305	5	1283	0.341266
GO:0005852	eukaryotic translation initiation factor 3 complex	cellular_component	9	circRNA1272(LOC111905994);circRNA801(LOC111876651)	2	305	5	1283	0.341266
GO:0035091	phosphatidylinositol binding	molecular_function	6	circRNA869(LOC111892542);circRNA889(LOC111879838)	2	305	5	1283	0.341266
GO:0003743	translation initiation factor activity	molecular_function	8	circRNA1272(LOC111905994);circRNA63(LOC111878056)	2	305	5	1283	0.341266
GO:0016853	isomerase activity	molecular_function	4	circRNA1118(LOC111891533);circRNA358(LOC111913863)	2	305	5	1283	0.341266
GO:0036459	thiol-dependent ubiquitinyl hydrolase activity	molecular_function	5	circRNA28(LOC111916610);circRNA610(LOC111907803)	2	305	5	1283	0.341266
GO:0016597	amino acid binding	molecular_function	7	circRNA27(LOC111915463);circRNA474(LOC111899648);circRNA522(LOC111915463)	2	305	5	1283	0.341266
GO:0016579	protein deubiquitination	biological_process	10	circRNA28(LOC111916610);circRNA610(LOC111907803)	2	305	5	1283	0.341266
GO:0010319	stromule	cellular_component	12	circRNA325(LOC111895989);circRNA365(LOC111910617)	2	305	5	1283	0.341266
GO:0004702	receptor signaling protein serine/threonine kinase activity	molecular_function	9	circRNA356(LOC111897892);circRNA464(LOC111880005)	2	305	5	1283	0.341266
GO:0009941	chloroplast envelope	cellular_component	12	circRNA114(LOC111896753);circRNA115(LOC111896753);circRNA1160(LOC111896961);circRNA116(LOC111896753);circRNA142(LOC111913556);circRNA203(LOC111896959);circRNA272(LOC111882434);circRNA365(LOC111910617);circRNA401(LOC111913556);circRNA436(LOC111908560);circRNA500(LOC111882434);circRNA618(LOC111884373);circRNA719(LOC111895632);circRNA76(LOC111886111);circRNA77(LOC111886111);circRNA834(LOC111910329);…	13	305	48	1283	0.344569
GO:0016192	vesicle-mediated transport	biological_process	6	circRNA12(LOC111890540);circRNA228(LOC111880154);circRNA86(LOC111885653);circRNA87(LOC111885653)	3	305	9	1283	0.364841
GO:0042742	defense response to bacterium	biological_process	7	circRNA245(LOC111898305);circRNA365(LOC111910617);circRNA618(LOC111884373);circRNA86(LOC111885653);circRNA87(LOC111885653)	4	305	13	1283	0.37443
GO:0048046	apoplast	cellular_component	4	circRNA325(LOC111895989);circRNA365(LOC111910617);circRNA542(LOC111900571);circRNA618(LOC111884373);circRNA76(LOC111886111);circRNA77(LOC111886111)	5	305	17	1283	0.378923
GO:0016021	integral component of membrane	cellular_component	6	circRNA103(LOC111884224);circRNA1160(LOC111896961);circRNA1174(LOC111892427);circRNA122(LOC111892623);circRNA1250(LOC111917198);circRNA13(LOC111881361);circRNA149(LOC111886137);circRNA155(LOC111911774);circRNA168(LOC111894897);circRNA184(LOC111889346);circRNA185(LOC111876585);circRNA186(LOC111876584);circRNA18(LOC111884285);circRNA21(LOC111919244);circRNA229(LOC111893505);circRNA230(LOC111893505)…	43	305	174	1283	0.409375
GO:0004372	glycine hydroxymethyltransferase activity	molecular_function	7	circRNA325(LOC111895989)	1	305	2	1283	0.419077
GO:0042936	dipeptide transporter activity	molecular_function	7	circRNA418(LOC111892811)	1	305	2	1283	0.419077
GO:0016594	glycine binding	molecular_function	8	circRNA737(LOC111883291)	1	305	2	1283	0.419077
GO:0035999	tetrahydrofolate interconversion	biological_process	9	circRNA325(LOC111895989)	1	305	2	1283	0.419077
GO:0009753	response to jasmonic acid	biological_process	6	circRNA365(LOC111910617)	1	305	2	1283	0.419077
GO:0009251	glucan catabolic process	biological_process	8	circRNA923(LOC111907753)	1	305	2	1283	0.419077
GO:0043255	regulation of carbohydrate biosynthetic process	biological_process	7	circRNA935(LOC111901375)	1	305	2	1283	0.419077
GO:0001522	pseudouridine synthesis	biological_process	10	circRNA1118(LOC111891533)	1	305	2	1283	0.419077
GO:0030488	tRNA methylation	biological_process	13	circRNA61(LOC111885288)	1	305	2	1283	0.419077
GO:0048573	photoperiodism, flowering	biological_process	6	circRNA96(LOC111890907)	1	305	2	1283	0.419077
GO:0042132	fructose 1,6-bisphosphate 1-phosphatase activity	molecular_function	10	circRNA1328(LOC111890618)	1	305	2	1283	0.419077
GO:0010025	wax biosynthetic process	biological_process	5	circRNA112(LOC111878066)	1	305	2	1283	0.419077
GO:0031365	N-terminal protein amino acid modification	biological_process	8	circRNA211(LOC111876920)	1	305	2	1283	0.419077
GO:0006366	transcription from RNA polymerase II promoter	biological_process	11	circRNA512(LOC111906077)	1	305	2	1283	0.419077
GO:0005669	transcription factor TFIID complex	cellular_component	10	circRNA427(LOC111886967)	1	305	2	1283	0.419077
GO:0098656	anion transmembrane transport	biological_process	7	circRNA270(LOC111887307);circRNA498(LOC111887307)	1	305	2	1283	0.419077
GO:0051017	actin filament bundle assembly	biological_process	9	circRNA491(LOC111895660)	1	305	2	1283	0.419077
GO:0009631	cold acclimation	biological_process	6	ciRNA11(LOC111921286)	1	305	2	1283	0.419077
GO:0004034	aldose 1-epimerase activity	molecular_function	7	circRNA358(LOC111913863)	1	305	2	1283	0.419077
GO:0046323	glucose import	biological_process	9	circRNA1291(LOC111905298)	1	305	2	1283	0.419077
GO:0005623	cell	cellular_component	3	circRNA1160(LOC111896961)	1	305	2	1283	0.419077
GO:0048497	maintenance of floral organ identity	biological_process	10	circRNA1370(LOC111884458)	1	305	2	1283	0.419077
GO:0010193	response to ozone	biological_process	7	circRNA285(LOC111878886)	1	305	2	1283	0.419077
GO:0004564	beta-fructofuranosidase activity	molecular_function	7	circRNA4(LOC111890053)	1	305	2	1283	0.419077
GO:0016051	carbohydrate biosynthetic process	biological_process	6	circRNA766(LOC111878490)	1	305	2	1283	0.419077
GO:0070062	extracellular exosome	cellular_component	7	circRNA496(LOC111917919)	1	305	2	1283	0.419077
GO:0010029	regulation of seed germination	biological_process	9	circRNA4(LOC111890053)	1	305	2	1283	0.419077
GO:0006563	L-serine metabolic process	biological_process	9	circRNA325(LOC111895989)	1	305	2	1283	0.419077
GO:0000301	retrograde transport, vesicle recycling within Golgi	biological_process	8	circRNA545(LOC111876115)	1	305	2	1283	0.419077
GO:0001106	RNA polymerase II transcription corepressor activity	molecular_function	7	circRNA15(LOC111909092)	1	305	2	1283	0.419077
GO:0051539	4 iron, 4 sulfur cluster binding	molecular_function	6	circRNA196(LOC111898038)	1	305	2	1283	0.419077
GO:0046034	ATP metabolic process	biological_process	12	circRNA491(LOC111895660)	1	305	2	1283	0.419077
GO:0019887	protein kinase regulator activity	molecular_function	5	circRNA180(LOC111886177)	1	305	2	1283	0.419077
GO:0033180	proton-transporting V-type ATPase, V1 domain	cellular_component	7	circRNA491(LOC111895660)	1	305	2	1283	0.419077
GO:0006625	protein targeting to peroxisome	biological_process	7	circRNA9(LOC111901177)	1	305	2	1283	0.419077
GO:0034975	protein folding in endoplasmic reticulum	biological_process	8	circRNA37(LOC111875883)	1	305	2	1283	0.419077
GO:0080019	fatty-acyl-CoA reductase (alcohol-forming) activity	molecular_function	7	circRNA74(LOC111905397)	1	305	2	1283	0.419077
GO:0004521	endoribonuclease activity	molecular_function	8	circRNA168(LOC111894897)	1	305	2	1283	0.419077
GO:0047262	polygalacturonate 4-alpha-galacturonosyltransferase activity	molecular_function	7	circRNA766(LOC111878490)	1	305	2	1283	0.419077
GO:0046283	anthocyanin-containing compound metabolic process	biological_process	6	circRNA96(LOC111890907)	1	305	2	1283	0.419077
GO:0030490	maturation of SSU-rRNA	biological_process	12	circRNA163(LOC111887406);circRNA414(LOC111887406)	1	305	2	1283	0.419077
GO:0043248	proteasome assembly	biological_process	9	circRNA46(LOC111911243)	1	305	2	1283	0.419077
GO:0043044	ATP-dependent chromatin remodeling	biological_process	9	circRNA42(LOC111902664)	1	305	2	1283	0.419077
GO:0008540	proteasome regulatory particle, base subcomplex	cellular_component	10	circRNA46(LOC111911243)	1	305	2	1283	0.419077
GO:0010494	cytoplasmic stress granule	cellular_component	10	circRNA1013(LOC111910334)	1	305	2	1283	0.419077
GO:0010199	organ boundary specification between lateral organs and the meristem	biological_process	9	circRNA42(LOC111902664)	1	305	2	1283	0.419077
GO:0031418	L-ascorbic acid binding	molecular_function	6	circRNA26(LOC111915462)	1	305	2	1283	0.419077
GO:0030968	endoplasmic reticulum unfolded protein response	biological_process	8	circRNA168(LOC111894897)	1	305	2	1283	0.419077
GO:2000031	regulation of salicylic acid mediated signaling pathway	biological_process	8	circRNA271(LOC111882405)	1	305	2	1283	0.419077
GO:0030388	fructose 1,6-bisphosphate metabolic process	biological_process	7	circRNA1328(LOC111890618)	1	305	2	1283	0.419077
GO:0072546	ER membrane protein complex	cellular_component	14	circRNA37(LOC111875883)	1	305	2	1283	0.419077
GO:0009225	nucleotide-sugar metabolic process	biological_process	10	circRNA229(LOC111893505);circRNA230(LOC111893505);circRNA465(LOC111893505)	1	305	2	1283	0.419077
GO:0006346	methylation-dependent chromatin silencing	biological_process	14	circRNA299(LOC111901150)	1	305	2	1283	0.419077
GO:0000439	core TFIIH complex	cellular_component	11	circRNA192(LOC111877504)	1	305	2	1283	0.419077
GO:0009294	DNA mediated transformation	biological_process	6	circRNA622(LOC111881463)	1	305	2	1283	0.419077
GO:0008420	CTD phosphatase activity	molecular_function	10	circRNA514(LOC111900903)	1	305	2	1283	0.419077
GO:0040029	regulation of gene expression, epigenetic	biological_process	8	circRNA42(LOC111902664)	1	305	2	1283	0.419077
GO:2001141	regulation of RNA biosynthetic process	biological_process	9	circRNA359(LOC111892130)	1	305	2	1283	0.419077
GO:0070940	dephosphorylation of RNA polymerase II C-terminal domain	biological_process	13	circRNA514(LOC111900903)	1	305	2	1283	0.419077
GO:0006816	calcium ion transport	biological_process	9	circRNA484(LOC111899920)	1	305	2	1283	0.419077
GO:0016591	DNA-directed RNA polymerase II, holoenzyme	cellular_component	10	circRNA514(LOC111900903)	1	305	2	1283	0.419077
GO:0015140	malate transmembrane transporter activity	molecular_function	10	circRNA68(LOC111917846)	1	305	2	1283	0.419077
GO:0001077	transcriptional activator activity, RNA polymerase II core promoter proximal region sequence-specific binding	molecular_function	7	circRNA89(LOC111911751)	1	305	2	1283	0.419077
GO:0035197	siRNA binding	molecular_function	7	circRNA756(LOC111885992)	1	305	2	1283	0.419077
GO:0005675	holo TFIIH complex	cellular_component	10	circRNA192(LOC111877504)	1	305	2	1283	0.419077
GO:0071472	cellular response to salt stress	biological_process	7	circRNA91(LOC111893949)	1	305	2	1283	0.419077
GO:0005355	glucose transmembrane transporter activity	molecular_function	10	circRNA1291(LOC111905298)	1	305	2	1283	0.419077
GO:0042938	dipeptide transport	biological_process	8	circRNA418(LOC111892811)	1	305	2	1283	0.419077
GO:0042372	phylloquinone biosynthetic process	biological_process	8	circRNA153(LOC111877815)	1	305	2	1283	0.419077
GO:0000462	maturation of SSU-rRNA from tricistronic rRNA transcript (SSU-rRNA, 5.8S rRNA, LSU-rRNA	biological_process	13	circRNA1408(LOC111888125);circRNA486(LOC111888125)	1	305	2	1283	0.419077
GO:0006342	chromatin silencing	biological_process	13	circRNA196(LOC111898038)	1	305	2	1283	0.419077
GO:0007064	mitotic sister chromatid cohesion	biological_process	9	circRNA287(LOC111880206)	1	305	2	1283	0.419077
GO:0051693	actin filament capping	biological_process	12	circRNA491(LOC111895660)	1	305	2	1283	0.419077
GO:0005786	signal recognition particle, endoplasmic reticulum targeting	cellular_component	10	circRNA396(LOC111898893)	1	305	2	1283	0.419077
GO:0048528	post-embryonic root development	biological_process	7	circRNA452(LOC111893404)	1	305	2	1283	0.419077
GO:0016444	somatic cell DNA recombination	biological_process	10	circRNA622(LOC111881463)	1	305	2	1283	0.419077
GO:0004375	glycine dehydrogenase (decarboxylating) activity	molecular_function	7	circRNA737(LOC111883291)	1	305	2	1283	0.419077
GO:0006306	DNA methylation	biological_process	11	circRNA196(LOC111898038)	1	305	2	1283	0.419077
GO:0048574	long-day photoperiodism, flowering	biological_process	7	circRNA703(LOC111884655)	1	305	2	1283	0.419077
GO:0009058	biosynthetic process	biological_process	4	circRNA547(LOC111888552)	1	305	2	1283	0.419077
GO:0008235	metalloexopeptidase activity	molecular_function	8	circRNA211(LOC111876920)	1	305	2	1283	0.419077
GO:0009926	auxin polar transport	biological_process	7	circRNA707(LOC111915996)	1	305	2	1283	0.419077
GO:0006544	glycine metabolic process	biological_process	9	circRNA325(LOC111895989)	1	305	2	1283	0.419077
GO:0030599	pectinesterase activity	molecular_function	7	circRNA147(LOC111883025)	1	305	2	1283	0.419077
GO:0004575	sucrose alpha-glucosidase activity	molecular_function	8	circRNA4(LOC111890053)	1	305	2	1283	0.419077
GO:0009739	response to gibberellin	biological_process	6	circRNA413(LOC111883669)	1	305	2	1283	0.419077
GO:0016168	chlorophyll binding	molecular_function	6	ciRNA8(LOC111878096)	1	305	2	1283	0.419077
GO:0010345	suberin biosynthetic process	biological_process	8	circRNA74(LOC111905397)	1	305	2	1283	0.419077
GO:0008327	methyl-CpG binding	molecular_function	6	circRNA299(LOC111901150)	1	305	2	1283	0.419077
GO:0006000	fructose metabolic process	biological_process	9	circRNA1328(LOC111890618)	1	305	2	1283	0.419077
GO:0005847	mRNA cleavage and polyadenylation specificity factor complex	cellular_component	14	circRNA179(LOC111918716)	1	305	2	1283	0.419077
GO:0035428	hexose transmembrane transport	biological_process	7	circRNA1291(LOC111905298)	1	305	2	1283	0.419077
GO:0035336	long-chain fatty-acyl-CoA metabolic process	biological_process	9	circRNA74(LOC111905397)	1	305	2	1283	0.419077
GO:0006646	phosphatidylethanolamine biosynthetic process	biological_process	8	circRNA547(LOC111888552)	1	305	2	1283	0.419077
GO:0016973	poly(A)+ mRNA export from nucleus	biological_process	8	circRNA179(LOC111918716)	1	305	2	1283	0.419077
GO:0042744	hydrogen peroxide catabolic process	biological_process	6	circRNA453(LOC111878431)	1	305	2	1283	0.419077
GO:0004190	aspartic-type endopeptidase activity	molecular_function	8	circRNA202(LOC111915340)	1	305	2	1283	0.419077
GO:0032580	Golgi cisterna membrane	cellular_component	12	circRNA229(LOC111893505);circRNA230(LOC111893505);circRNA465(LOC111893505)	1	305	2	1283	0.419077
GO:0000266	mitochondrial fission	biological_process	6	circRNA1047(LOC111893428);circRNA235(LOC111893428)	1	305	2	1283	0.419077
GO:0045036	protein targeting to chloroplast	biological_process	7	circRNA1160(LOC111896961)	1	305	2	1283	0.419077
GO:0010030	positive regulation of seed germination	biological_process	10	circRNA360(LOC111878746)	1	305	2	1283	0.419077
GO:0045892	negative regulation of transcription, DNA-templated	biological_process	12	circRNA360(LOC111878746)	1	305	2	1283	0.419077
GO:0008143	poly(A) binding	molecular_function	9	circRNA97(LOC111890918)	1	305	2	1283	0.419077
GO:0070652	HAUS complex	cellular_component	12	circRNA548(LOC111889254)	1	305	2	1283	0.419077
GO:0009098	leucine biosynthetic process	biological_process	9	ciRNA84(LOC111911663)	1	305	2	1283	0.419077
GO:0016758	transferase activity, transferring hexosyl groups	molecular_function	6	circRNA606(LOC111882217)	1	305	2	1283	0.419077
GO:0003985	acetyl-CoA C-acetyltransferase activity	molecular_function	9	circRNA468(LOC111900486)	1	305	2	1283	0.419077
GO:0030835	negative regulation of actin filament depolymerization	biological_process	11	circRNA491(LOC111895660)	1	305	2	1283	0.419077
GO:0004656	procollagen-proline 4-dioxygenase activity	molecular_function	9	circRNA26(LOC111915462)	1	305	2	1283	0.419077
GO:0006490	oligosaccharide-lipid intermediate biosynthetic process	biological_process	8	circRNA269(LOC111917918)	1	305	2	1283	0.419077
GO:0031307	integral component of mitochondrial outer membrane	cellular_component	15	circRNA547(LOC111888552)	1	305	2	1283	0.419077
GO:0042254	ribosome biogenesis	biological_process	6	circRNA109(LOC111901567);circRNA110(LOC111901567)	1	305	2	1283	0.419077
GO:0051225	spindle assembly	biological_process	8	circRNA548(LOC111889254)	1	305	2	1283	0.419077
GO:0009982	pseudouridine synthase activity	molecular_function	6	circRNA1118(LOC111891533)	1	305	2	1283	0.419077
GO:0005743	mitochondrial inner membrane	cellular_component	13	circRNA376(LOC111915140)	1	305	2	1283	0.419077
GO:0005622	intracellular	cellular_component	5	circRNA1160(LOC111896961);circRNA289(LOC111906099);circRNA338(LOC111887738);circRNA362(LOC111887953);circRNA428(LOC111898325);circRNA443(LOC111889597);circRNA820(LOC111884380);circRNA892(LOC111891116)	8	305	30	1283	0.422638
GO:0008150	biological_process	biological_process	2	circRNA1174(LOC111892427);circRNA118(LOC111891401);circRNA119(LOC111892154);circRNA1208(LOC111877591);circRNA1244(LOC111879238);circRNA130(LOC111903326);circRNA185(LOC111876585);circRNA186(LOC111876584);circRNA18(LOC111884285);circRNA21(LOC111919244);circRNA221(LOC111894830);circRNA244(LOC111915477);circRNA259(LOC111908173);circRNA278(LOC111917988);circRNA279(LOC111877834);circRNA282(LOC111878917…	38	305	154	1283	0.423632
GO:0046872	metal ion binding	molecular_function	6	circRNA1160(LOC111896961);circRNA1328(LOC111890618);circRNA168(LOC111894897);circRNA179(LOC111918716);circRNA196(LOC111898038);circRNA211(LOC111876920);circRNA247(LOC111905299);circRNA297(LOC111887279);circRNA468(LOC111900486);circRNA508(LOC111901800);circRNA583(LOC111908040);circRNA609(LOC111879658);circRNA703(LOC111884655);circRNA78(LOC111886089);circRNA792(LOC111907258);circRNA882(LOC111893507…	17	305	67	1283	0.424217
GO:0009534	chloroplast thylakoid	cellular_component	12	circRNA325(LOC111895989);circRNA48(LOC111920386);circRNA586(LOC111901950);circRNA618(LOC111884373);circRNA719(LOC111895632);circRNA730(LOC111920386)	5	305	18	1283	0.432298
GO:0004722	protein serine/threonine phosphatase activity	molecular_function	9	circRNA247(LOC111905299);circRNA297(LOC111887279);circRNA508(LOC111901800);circRNA792(LOC111907258)	4	305	14	1283	0.435253
GO:0009825	multidimensional cell growth	biological_process	6	circRNA553(LOC111909700);circRNA583(LOC111908040)	2	305	6	1283	0.436888
GO:0031338	regulation of vesicle fusion	biological_process	7	circRNA362(LOC111887953);circRNA428(LOC111898325)	2	305	6	1283	0.436888
GO:0009705	plant-type vacuole membrane	cellular_component	11	circRNA155(LOC111911774);circRNA68(LOC111917846)	2	305	6	1283	0.436888
GO:0004843	thiol-dependent ubiquitin-specific protease activity	molecular_function	9	circRNA28(LOC111916610);circRNA610(LOC111907803)	2	305	6	1283	0.436888
GO:0009543	chloroplast thylakoid lumen	cellular_component	13	circRNA586(LOC111901950);circRNA618(LOC111884373)	2	305	6	1283	0.436888
GO:0007015	actin filament organization	biological_process	7	circRNA20(LOC111885973);circRNA553(LOC111909700)	2	305	6	1283	0.436888
GO:0000932	cytoplasmic mRNA processing body	cellular_component	10	circRNA127(LOC111881148);circRNA245(LOC111898305)	2	305	6	1283	0.436888
GO:0005249	voltage-gated potassium channel activity	molecular_function	11	circRNA258(LOC111887164);circRNA273(LOC111885436)	2	305	6	1283	0.436888
GO:0042391	regulation of membrane potential	biological_process	5	circRNA258(LOC111887164);circRNA273(LOC111885436)	2	305	6	1283	0.436888
GO:0010287	plastoglobule	cellular_component	13	circRNA365(LOC111910617);ciRNA8(LOC111878096)	2	305	6	1283	0.436888
GO:0003777	microtubule motor activity	molecular_function	10	circRNA305(LOC111916017);circRNA356(LOC111897892);circRNA513(LOC111911566)	3	305	10	1283	0.437442
GO:0005096	GTPase activator activity	molecular_function	5	circRNA362(LOC111887953);circRNA428(LOC111898325);circRNA882(LOC111893507)	3	305	10	1283	0.437442
GO:0006891	intra-Golgi vesicle-mediated transport	biological_process	7	circRNA13(LOC111881361);circRNA246(LOC111877354);circRNA443(LOC111889597)	3	305	10	1283	0.437442
GO:0016788	hydrolase activity, acting on ester bonds	molecular_function	5	circRNA153(LOC111877815);circRNA319(LOC111883268);circRNA696(LOC111892038)	3	305	10	1283	0.437442
GO:0004842	ubiquitin-protein transferase activity	molecular_function	6	circRNA505(LOC111908577);circRNA7(LOC111883380);circRNA96(LOC111890907)	3	305	10	1283	0.437442
GO:0043231	intracellular membrane-bounded organelle	cellular_component	8	circRNA1109(LOC111913855);circRNA387(LOC111887675);circRNA74(LOC111905397)	3	305	10	1283	0.437442
GO:0008270	zinc ion binding	molecular_function	8	circRNA192(LOC111877504);circRNA220(LOC111912176);circRNA245(LOC111898305);circRNA277(LOC111895324);circRNA287(LOC111880206);circRNA308(LOC111914310);circRNA360(LOC111878746);circRNA366(LOC111890173);circRNA416(LOC111905529);circRNA641(LOC111897616);circRNA849(LOC111896910);circRNA928(LOC111914310);circRNA935(LOC111901375);circRNA96(LOC111890907)	13	305	52	1283	0.470947
GO:0016020	membrane	cellular_component	3	circRNA102(LOC111889528);circRNA149(LOC111886137);circRNA167(LOC111921257);circRNA239(LOC111914709);circRNA272(LOC111882434);circRNA325(LOC111895989);circRNA365(LOC111910617);circRNA418(LOC111892811);circRNA496(LOC111917919);circRNA500(LOC111882434);circRNA614(LOC111886137);circRNA683(LOC111887277);circRNA76(LOC111886111);circRNA77(LOC111886111);circRNA882(LOC111893507)	12	305	48	1283	0.476453
GO:0007018	microtubule-based movement	biological_process	6	circRNA305(LOC111916017);circRNA356(LOC111897892);circRNA379(LOC111889166);circRNA513(LOC111911566);circRNA785(LOC111889166)	4	305	15	1283	0.494303
GO:0005871	kinesin complex	cellular_component	12	circRNA305(LOC111916017);circRNA356(LOC111897892);circRNA379(LOC111889166);circRNA513(LOC111911566);circRNA785(LOC111889166)	4	305	15	1283	0.494303
GO:0016887	ATPase activity	molecular_function	9	circRNA142(LOC111913556);circRNA305(LOC111916017);circRNA356(LOC111897892);circRNA401(LOC111913556);circRNA513(LOC111911566)	4	305	15	1283	0.494303
GO:0006281	DNA repair	biological_process	9	circRNA142(LOC111913556);circRNA196(LOC111898038);circRNA401(LOC111913556);circRNA622(LOC111881463);circRNA96(LOC111890907)	4	305	15	1283	0.494303
GO:0019898	extrinsic component of membrane	cellular_component	5	circRNA586(LOC111901950);circRNA618(LOC111884373);circRNA889(LOC111879838)	3	305	11	1283	0.506665
GO:0016567	protein ubiquitination	biological_process	10	circRNA650(LOC111915367);circRNA7(LOC111883380);circRNA96(LOC111890907)	3	305	11	1283	0.506665
GO:0061630	ubiquitin protein ligase activity	molecular_function	7	circRNA1031(LOC111878838);circRNA219(LOC111893751);circRNA96(LOC111890907)	3	305	11	1283	0.506665
GO:0005575	cellular_component	cellular_component	2	circRNA1208(LOC111877591);circRNA496(LOC111917919);circRNA654(LOC111913289)	3	305	11	1283	0.506665
GO:0005618	cell wall	cellular_component	6	circRNA147(LOC111883025);circRNA365(LOC111910617);circRNA537(LOC111896900);circRNA542(LOC111900571);circRNA543(LOC111887745);circRNA99(LOC111916189)	6	305	24	1283	0.522916
GO:0004386	helicase activity	molecular_function	9	circRNA245(LOC111898305);circRNA42(LOC111902664)	2	305	7	1283	0.524408
GO:0017137	Rab GTPase binding	molecular_function	9	circRNA362(LOC111887953);circRNA428(LOC111898325)	2	305	7	1283	0.524408
GO:0005654	nucleoplasm	cellular_component	11	circRNA1031(LOC111878838);circRNA233(LOC111915371)	2	305	7	1283	0.524408
GO:0007623	circadian rhythm	biological_process	4	circRNA325(LOC111895989);circRNA4(LOC111890053)	2	305	7	1283	0.524408
GO:0007275	multicellular organism development	biological_process	5	circRNA321(LOC111911961);circRNA948(LOC111876869)	2	305	7	1283	0.524408
GO:0022626	cytosolic ribosome	cellular_component	11	circRNA325(LOC111895989);circRNA76(LOC111886111);circRNA77(LOC111886111)	2	305	7	1283	0.524408
GO:0046686	response to cadmium ion	biological_process	7	circRNA325(LOC111895989);circRNA493(LOC111894376);circRNA622(LOC111881463);circRNA78(LOC111886089)	4	305	16	1283	0.550594
GO:0042803	protein homodimerization activity	molecular_function	6	circRNA142(LOC111913556);circRNA366(LOC111890173);circRNA376(LOC111915140);circRNA401(LOC111913556);circRNA413(LOC111883669)	4	305	16	1283	0.550594
GO:0006351	transcription, DNA-templated	biological_process	10	circRNA101(LOC111915859);circRNA1176(LOC111881919);circRNA1370(LOC111884458);circRNA168(LOC111894897);circRNA192(LOC111877504);circRNA196(LOC111898038);circRNA289(LOC111906099);circRNA321(LOC111911961);circRNA360(LOC111878746);circRNA413(LOC111883669);circRNA42(LOC111902664);circRNA53(LOC111894934);circRNA703(LOC111884655);circRNA81(LOC111876998)	14	305	59	1283	0.555599
GO:0006396	RNA processing	biological_process	9	circRNA338(LOC111887738)	1	305	3	1283	0.557392
GO:0016126	sterol biosynthetic process	biological_process	8	circRNA748(LOC111887746)	1	305	3	1283	0.557392
GO:0030095	chloroplast photosystem II	cellular_component	14	circRNA618(LOC111884373)	1	305	3	1283	0.557392
GO:0006486	protein glycosylation	biological_process	8	circRNA606(LOC111882217)	1	305	3	1283	0.557392
GO:0005840	ribosome	cellular_component	9	circRNA48(LOC111920386);circRNA730(LOC111920386)	1	305	3	1283	0.557392
GO:0006890	retrograde vesicle-mediated transport, Golgi to ER	biological_process	7	circRNA545(LOC111876115)	1	305	3	1283	0.557392
GO:0016604	nuclear body	cellular_component	13	circRNA96(LOC111890907)	1	305	3	1283	0.557392
GO:0005666	DNA-directed RNA polymerase III complex	cellular_component	10	circRNA198(LOC111905952)	1	305	3	1283	0.557392
GO:0048471	perinuclear region of cytoplasm	cellular_component	9	circRNA91(LOC111893949)	1	305	3	1283	0.557392
GO:0005694	chromosome	cellular_component	9	circRNA609(LOC111879658)	1	305	3	1283	0.557392
GO:0019829	cation-transporting ATPase activity	molecular_function	14	circRNA387(LOC111887675)	1	305	3	1283	0.557392
GO:0004721	phosphoprotein phosphatase activity	molecular_function	8	circRNA247(LOC111905299)	1	305	3	1283	0.557392
GO:0017025	TBP-class protein binding	molecular_function	6	circRNA416(LOC111905529)	1	305	3	1283	0.557392
GO:0005983	starch catabolic process	biological_process	8	circRNA1328(LOC111890618)	1	305	3	1283	0.557392
GO:0003899	DNA-directed RNA polymerase activity	molecular_function	8	circRNA359(LOC111892130)	1	305	3	1283	0.557392
GO:0016987	sigma factor activity	molecular_function	6	circRNA359(LOC111892130)	1	305	3	1283	0.557392
GO:0019706	protein-cysteine S-palmitoyltransferase activity	molecular_function	8	circRNA277(LOC111895324)	1	305	3	1283	0.557392
GO:0042542	response to hydrogen peroxide	biological_process	7	circRNA453(LOC111878431)	1	305	3	1283	0.557392
GO:0001053	plastid sigma factor activity	molecular_function	7	circRNA359(LOC111892130)	1	305	3	1283	0.557392
GO:0004017	adenylate kinase activity	molecular_function	9	circRNA571(LOC111921492)	1	305	3	1283	0.557392
GO:0005685	U1 snRNP	cellular_component	9	circRNA104(LOC111894694)	1	305	3	1283	0.557392
GO:0009958	positive gravitropism	biological_process	7	circRNA1196(LOC111915286)	1	305	3	1283	0.557392
GO:0030163	protein catabolic process	biological_process	7	circRNA202(LOC111915340)	1	305	3	1283	0.557392
GO:0008033	tRNA processing	biological_process	11	circRNA1118(LOC111891533)	1	305	3	1283	0.557392
GO:0005681	spliceosomal complex	cellular_component	8	circRNA167(LOC111921257)	1	305	3	1283	0.557392
GO:2000022	regulation of jasmonic acid mediated signaling pathway	biological_process	9	circRNA123(LOC111892588)	1	305	3	1283	0.557392
GO:0042026	protein refolding	biological_process	8	circRNA76(LOC111886111);circRNA77(LOC111886111)	1	305	3	1283	0.557392
GO:0016311	dephosphorylation	biological_process	7	circRNA1328(LOC111890618)	1	305	3	1283	0.557392
GO:0000049	tRNA binding	molecular_function	7	circRNA1118(LOC111891533)	1	305	3	1283	0.557392
GO:0015086	cadmium ion transmembrane transporter activity	molecular_function	11	circRNA387(LOC111887675)	1	305	3	1283	0.557392
GO:0042147	retrograde transport, endosome to Golgi	biological_process	7	circRNA718(LOC111915452)	1	305	3	1283	0.557392
GO:0017148	negative regulation of translation	biological_process	9	circRNA127(LOC111881148)	1	305	3	1283	0.557392
GO:0009750	response to fructose	biological_process	9	circRNA1328(LOC111890618)	1	305	3	1283	0.557392
GO:0003841	1-acylglycerol-3-phosphate O-acyltransferase activity	molecular_function	9	circRNA469(LOC111879165)	1	305	3	1283	0.557392
GO:0005643	nuclear pore	cellular_component	12	circRNA233(LOC111915371)	1	305	3	1283	0.557392
GO:0009933	meristem structural organization	biological_process	9	ciRNA11(LOC111921286)	1	305	3	1283	0.557392
GO:0006857	oligopeptide transport	biological_process	7	circRNA418(LOC111892811)	1	305	3	1283	0.557392
GO:0006515	misfolded or incompletely synthesized protein catabolic process	biological_process	9	circRNA9(LOC111901177)	1	305	3	1283	0.557392
GO:0010027	thylakoid membrane organization	biological_process	7	circRNA704(LOC111907349)	1	305	3	1283	0.557392
GO:0006334	nucleosome assembly	biological_process	12	circRNA622(LOC111881463)	1	305	3	1283	0.557392
GO:0009910	negative regulation of flower development	biological_process	9	circRNA1370(LOC111884458)	1	305	3	1283	0.557392
GO:0000470	maturation of LSU-rRNA	biological_process	12	circRNA163(LOC111887406);circRNA414(LOC111887406)	1	305	3	1283	0.557392
GO:0001228	transcriptional activator activity, RNA polymerase II transcription regulatory region sequence-specific binding	molecular_function	6	circRNA512(LOC111906077)	1	305	3	1283	0.557392
GO:0005960	glycine cleavage complex	cellular_component	9	circRNA737(LOC111883291)	1	305	3	1283	0.557392
GO:0051015	actin filament binding	molecular_function	7	circRNA491(LOC111895660)	1	305	3	1283	0.557392
GO:0045490	pectin catabolic process	biological_process	8	circRNA147(LOC111883025)	1	305	3	1283	0.557392
GO:0051289	protein homotetramerization	biological_process	10	circRNA153(LOC111877815)	1	305	3	1283	0.557392
GO:0000287	magnesium ion binding	molecular_function	7	circRNA373(LOC111882285)	1	305	3	1283	0.557392
GO:0006357	regulation of transcription from RNA polymerase II promoter	biological_process	12	circRNA192(LOC111877504)	1	305	3	1283	0.557392
GO:0006913	nucleocytoplasmic transport	biological_process	8	circRNA126(LOC111892165)	1	305	3	1283	0.557392
GO:0001056	RNA polymerase III activity	molecular_function	9	circRNA198(LOC111905952)	1	305	3	1283	0.557392
GO:0007169	transmembrane receptor protein tyrosine kinase signaling pathway	biological_process	9	circRNA1250(LOC111917198)	1	305	3	1283	0.557392
GO:0004707	MAP kinase activity	molecular_function	10	circRNA44(LOC111914111)	1	305	3	1283	0.557392
GO:0018024	histone-lysine N-methyltransferase activity	molecular_function	10	circRNA609(LOC111879658)	1	305	3	1283	0.557392
GO:1903507	negative regulation of nucleic acid-templated transcription	biological_process	11	circRNA123(LOC111892588)	1	305	3	1283	0.557392
GO:0008219	cell death	biological_process	5	circRNA271(LOC111882405)	1	305	3	1283	0.557392
GO:0008757	S-adenosylmethionine-dependent methyltransferase activity	molecular_function	7	circRNA106(LOC111882643)	1	305	3	1283	0.557392
GO:0008422	beta-glucosidase activity	molecular_function	8	circRNA923(LOC111907753)	1	305	3	1283	0.557392
GO:0019905	syntaxin binding	molecular_function	6	circRNA322(LOC111888277)	1	305	3	1283	0.557392
GO:0005794	Golgi apparatus	cellular_component	9	circRNA13(LOC111881361);circRNA229(LOC111893505);circRNA230(LOC111893505);circRNA319(LOC111883268);circRNA377(LOC111915143);circRNA465(LOC111893505);circRNA491(LOC111895660);circRNA57(LOC111897745);circRNA583(LOC111908040);circRNA606(LOC111882217);circRNA766(LOC111878490);circRNA802(LOC111876654);circRNA882(LOC111893507);circRNA892(LOC111891116);circRNA935(LOC111901375)	13	305	55	1283	0.563725
GO:0046777	protein autophosphorylation	biological_process	9	circRNA1331(LOC111876416);circRNA168(LOC111894897);circRNA271(LOC111882405)	3	305	12	1283	0.571184
GO:0006470	protein dephosphorylation	biological_process	8	circRNA297(LOC111887279);circRNA508(LOC111901800);circRNA792(LOC111907258)	3	305	12	1283	0.571184
GO:0009832	plant-type cell wall biogenesis	biological_process	6	circRNA229(LOC111893505);circRNA230(LOC111893505);circRNA465(LOC111893505);circRNA583(LOC111908040)	2	305	8	1283	0.602268
GO:0005874	microtubule	cellular_component	11	circRNA548(LOC111889254);circRNA93(LOC111918008)	2	305	8	1283	0.602268
GO:0005819	spindle	cellular_component	9	circRNA1196(LOC111915286);circRNA548(LOC111889254)	2	305	8	1283	0.602268
GO:0005759	mitochondrial matrix	cellular_component	11	circRNA325(LOC111895989);circRNA834(LOC111910329)	2	305	8	1283	0.602268
GO:0043565	sequence-specific DNA binding	molecular_function	7	circRNA101(LOC111915859);circRNA413(LOC111883669);circRNA703(LOC111884655);circRNA89(LOC111911751)	4	305	17	1283	0.603415
GO:0005783	endoplasmic reticulum	cellular_component	9	circRNA112(LOC111878066);circRNA168(LOC111894897);circRNA240(LOC111899141);circRNA271(LOC111882405);circRNA319(LOC111883268);circRNA333(LOC111903253);circRNA62(LOC111903253);circRNA662(LOC111902705);circRNA748(LOC111887746)	8	305	35	1283	0.617506
GO:0009536	plastid	cellular_component	9	circRNA1160(LOC111896961);circRNA270(LOC111887307);circRNA498(LOC111887307);circRNA704(LOC111907349)	3	305	13	1283	0.63021
GO:0035556	intracellular signal transduction	biological_process	7	circRNA152(LOC111895907);circRNA347(LOC111921038);circRNA819(LOC111895907);circRNA820(LOC111884380)	3	305	13	1283	0.63021
GO:0009507	chloroplast	cellular_component	10	circRNA1035(LOC111877918);circRNA1099(LOC111905483);circRNA114(LOC111896753);circRNA115(LOC111896753);circRNA1160(LOC111896961);circRNA116(LOC111896753);circRNA1174(LOC111892427);circRNA1331(LOC111876416);circRNA153(LOC111877815);circRNA158(LOC111911063);circRNA168(LOC111894897);circRNA184(LOC111889346);circRNA203(LOC111896959);circRNA209(LOC111898538);circRNA213(LOC111877918);circRNA221(LOC11189…	39	305	170	1283	0.640239
GO:0005777	peroxisome	cellular_component	10	circRNA153(LOC111877815);circRNA170(LOC111892874);circRNA285(LOC111878886);circRNA468(LOC111900486)	4	305	18	1283	0.652306
GO:0006417	regulation of translation	biological_process	8	circRNA289(LOC111906099)	1	305	4	1283	0.662857
GO:0005770	late endosome	cellular_component	10	circRNA718(LOC111915452)	1	305	4	1283	0.662857
GO:0030048	actin filament-based movement	biological_process	6	circRNA236(LOC111914688);circRNA237(LOC111914688);circRNA238(LOC111914688)	1	305	4	1283	0.662857
GO:0005351	sugar:proton symporter activity	molecular_function	10	circRNA1291(LOC111905298)	1	305	4	1283	0.662857
GO:0005655	nucleolar ribonuclease P complex	cellular_component	10	circRNA132(LOC111877779)	1	305	4	1283	0.662857
GO:0004526	ribonuclease P activity	molecular_function	10	circRNA132(LOC111877779)	1	305	4	1283	0.662857
GO:0010150	leaf senescence	biological_process	10	circRNA365(LOC111910617)	1	305	4	1283	0.662857
GO:0006289	nucleotide-excision repair	biological_process	10	circRNA192(LOC111877504)	1	305	4	1283	0.662857
GO:0031347	regulation of defense response	biological_process	6	circRNA123(LOC111892588)	1	305	4	1283	0.662857
GO:0000209	protein polyubiquitination	biological_process	11	circRNA219(LOC111893751)	1	305	4	1283	0.662857
GO:0016459	myosin complex	cellular_component	11	circRNA236(LOC111914688);circRNA237(LOC111914688);circRNA238(LOC111914688)	1	305	4	1283	0.662857
GO:0006364	rRNA processing	biological_process	11	circRNA182(LOC111886220)	1	305	4	1283	0.662857
GO:0048278	vesicle docking	biological_process	6	circRNA668(LOC111909608)	1	305	4	1283	0.662857
GO:0006487	protein N-linked glycosylation	biological_process	9	circRNA269(LOC111917918)	1	305	4	1283	0.662857
GO:0042538	hyperosmotic salinity response	biological_process	7	circRNA583(LOC111908040)	1	305	4	1283	0.662857
GO:0047617	acyl-CoA hydrolase activity	molecular_function	8	circRNA153(LOC111877815)	1	305	4	1283	0.662857
GO:0005778	peroxisomal membrane	cellular_component	12	circRNA376(LOC111915140)	1	305	4	1283	0.662857
GO:0005385	zinc ion transmembrane transporter activity	molecular_function	11	circRNA387(LOC111887675)	1	305	4	1283	0.662857
GO:0090502	RNA phosphodiester bond hydrolysis, endonucleolytic	biological_process	10	circRNA132(LOC111877779)	1	305	4	1283	0.662857
GO:0071004	U2-type prespliceosome	cellular_component	10	circRNA104(LOC111894694)	1	305	4	1283	0.662857
GO:0000407	pre-autophagosomal structure	cellular_component	9	circRNA389(LOC111876705)	1	305	4	1283	0.662857
GO:0010020	chloroplast fission	biological_process	7	circRNA436(LOC111908560)	1	305	4	1283	0.662857
GO:0007062	sister chromatid cohesion	biological_process	6	circRNA287(LOC111880206)	1	305	4	1283	0.662857
GO:0005795	Golgi stack	cellular_component	11	circRNA443(LOC111889597)	1	305	4	1283	0.662857
GO:0030247	polysaccharide binding	molecular_function	5	circRNA194(LOC111921906)	1	305	4	1283	0.662857
GO:0006635	fatty acid beta-oxidation	biological_process	10	circRNA376(LOC111915140)	1	305	4	1283	0.662857
GO:1900150	regulation of defense response to fungus	biological_process	8	circRNA271(LOC111882405)	1	305	4	1283	0.662857
GO:0009816	defense response to bacterium, incompatible interaction	biological_process	7	circRNA168(LOC111894897)	1	305	4	1283	0.662857
GO:0071482	cellular response to light stimulus	biological_process	7	circRNA359(LOC111892130)	1	305	4	1283	0.662857
GO:0032040	small-subunit processome	cellular_component	9	circRNA163(LOC111887406);circRNA414(LOC111887406)	1	305	4	1283	0.662857
GO:0010311	lateral root formation	biological_process	7	circRNA112(LOC111878066)	1	305	4	1283	0.662857
GO:0003774	motor activity	molecular_function	9	circRNA236(LOC111914688);circRNA237(LOC111914688);circRNA238(LOC111914688)	1	305	4	1283	0.662857
GO:0048367	shoot system development	biological_process	7	ciRNA11(LOC111921286)	1	305	4	1283	0.662857
GO:0009846	pollen germination	biological_process	6	circRNA468(LOC111900486)	1	305	4	1283	0.662857
GO:0009742	brassinosteroid mediated signaling pathway	biological_process	9	circRNA102(LOC111889528)	1	305	4	1283	0.662857
GO:0009809	lignin biosynthetic process	biological_process	8	circRNA935(LOC111901375)	1	305	4	1283	0.662857
GO:0016538	cyclin-dependent protein serine/threonine kinase regulator activity	molecular_function	6	circRNA494(LOC111909597)	1	305	4	1283	0.662857
GO:0006897	endocytosis	biological_process	7	circRNA86(LOC111885653);circRNA87(LOC111885653);circRNA889(LOC111879838)	2	305	9	1283	0.670104
GO:0030154	cell differentiation	biological_process	6	circRNA1370(LOC111884458);circRNA413(LOC111883669)	2	305	9	1283	0.670104
GO:0009706	chloroplast inner membrane	cellular_component	14	circRNA436(LOC111908560);circRNA719(LOC111895632)	2	305	9	1283	0.670104
GO:0080008	Cul4-RING E3 ubiquitin ligase complex	cellular_component	9	circRNA118(LOC111891401);circRNA96(LOC111890907)	2	305	9	1283	0.670104
GO:0006352	DNA-templated transcription, initiation	biological_process	9	circRNA359(LOC111892130);circRNA427(LOC111886967)	2	305	9	1283	0.670104
GO:0009734	auxin-activated signaling pathway	biological_process	8	circRNA1196(LOC111915286);circRNA289(LOC111906099)	2	305	9	1283	0.670104
GO:0043161	proteasome-mediated ubiquitin-dependent protein catabolic process	biological_process	10	circRNA219(LOC111893751);circRNA46(LOC111911243)	2	305	9	1283	0.670104
GO:0015979	photosynthesis	biological_process	5	circRNA1328(LOC111890618);circRNA586(LOC111901950)	2	305	9	1283	0.670104
GO:0009535	chloroplast thylakoid membrane	cellular_component	13	circRNA365(LOC111910617);circRNA568(LOC111882253);circRNA618(LOC111884373);circRNA719(LOC111895632);ciRNA8(LOC111878096)	5	305	23	1283	0.67108
GO:0012505	endomembrane system	cellular_component	5	circRNA362(LOC111887953);circRNA428(LOC111898325);circRNA668(LOC111909608)	3	305	14	1283	0.683379
GO:0005509	calcium ion binding	molecular_function	7	circRNA452(LOC111893404);circRNA586(LOC111901950);circRNA618(LOC111884373)	3	305	14	1283	0.683379
GO:0009414	response to water deprivation	biological_process	5	circRNA101(LOC111915859);circRNA111(LOC111912980);circRNA271(LOC111882405)	3	305	14	1283	0.683379
GO:0009793	embryo development ending in seed dormancy	biological_process	5	circRNA287(LOC111880206);circRNA468(LOC111900486);circRNA704(LOC111907349);circRNA76(LOC111886111);circRNA77(LOC111886111);circRNA93(LOC111918008);ciRNA11(LOC111921286)	6	305	28	1283	0.687603
GO:0005515	protein binding	molecular_function	4	circRNA102(LOC111889528);circRNA1160(LOC111896961);circRNA1176(LOC111881919);circRNA1196(LOC111915286);circRNA12(LOC111890540);circRNA142(LOC111913556);circRNA158(LOC111911063);circRNA175(LOC111894597);circRNA180(LOC111886177);circRNA196(LOC111898038);circRNA228(LOC111880154);circRNA245(LOC111898305);circRNA271(LOC111882405);circRNA285(LOC111878886);circRNA289(LOC111906099);circRNA325(LOC11189598…	29	305	130	1283	0.695368
GO:0005856	cytoskeleton	cellular_component	9	circRNA175(LOC111894597);circRNA20(LOC111885973)	2	305	10	1283	0.728269
GO:0004176	ATP-dependent peptidase activity	molecular_function	7	circRNA220(LOC111912176);circRNA9(LOC111901177)	2	305	10	1283	0.728269
GO:0003682	chromatin binding	molecular_function	4	circRNA287(LOC111880206);circRNA42(LOC111902664)	2	305	10	1283	0.728269
GO:0042626	ATPase activity, coupled to transmembrane movement of substances	molecular_function	12	circRNA345(LOC111884945);circRNA376(LOC111915140);circRNA541(LOC111890855)	3	305	15	1283	0.730649
GO:0007165	signal transduction	biological_process	6	circRNA282(LOC111878917);circRNA283(LOC111878917);circRNA44(LOC111914111);circRNA51(LOC111879789);circRNA536(LOC111879789)	3	305	15	1283	0.730649
GO:0006810	transport	biological_process	5	circRNA704(LOC111907349);circRNA849(LOC111896910);circRNA892(LOC111891116)	3	305	15	1283	0.730649
GO:0009651	response to salt stress	biological_process	6	circRNA101(LOC111915859);circRNA1331(LOC111876416);circRNA285(LOC111878886)	3	305	15	1283	0.730649
GO:0000045	autophagosome assembly	biological_process	8	circRNA389(LOC111876705)	1	305	5	1283	0.743255
GO:0009707	chloroplast outer membrane	cellular_component	14	circRNA1160(LOC111896961)	1	305	5	1283	0.743255
GO:0007005	mitochondrion organization	biological_process	5	circRNA1047(LOC111893428);circRNA235(LOC111893428)	1	305	5	1283	0.743255
GO:0008574	ATP-dependent microtubule motor activity, plus-end-directed	molecular_function	11	circRNA379(LOC111889166);circRNA785(LOC111889166)	1	305	5	1283	0.743255
GO:0009965	leaf morphogenesis	biological_process	9	circRNA366(LOC111890173)	1	305	5	1283	0.743255
GO:0009826	unidimensional cell growth	biological_process	6	circRNA1250(LOC111917198)	1	305	5	1283	0.743255
GO:0010468	regulation of gene expression	biological_process	7	circRNA287(LOC111880206)	1	305	5	1283	0.743255
GO:0009853	photorespiration	biological_process	7	circRNA325(LOC111895989)	1	305	5	1283	0.743255
GO:0042128	nitrate assimilation	biological_process	6	circRNA180(LOC111886177)	1	305	5	1283	0.743255
GO:0004177	aminopeptidase activity	molecular_function	8	circRNA211(LOC111876920)	1	305	5	1283	0.743255
GO:0006413	translational initiation	biological_process	8	circRNA63(LOC111878056)	1	305	5	1283	0.743255
GO:0005543	phospholipid binding	molecular_function	5	circRNA882(LOC111893507)	1	305	5	1283	0.743255
GO:0016032	viral process	biological_process	5	circRNA86(LOC111885653);circRNA87(LOC111885653)	1	305	5	1283	0.743255
GO:0046658	anchored component of plasma membrane	cellular_component	8	circRNA194(LOC111921906)	1	305	5	1283	0.743255
GO:0015991	ATP hydrolysis coupled proton transport	biological_process	11	circRNA491(LOC111895660)	1	305	5	1283	0.743255
GO:0006906	vesicle fusion	biological_process	6	circRNA668(LOC111909608)	1	305	5	1283	0.743255
GO:0016117	carotenoid biosynthetic process	biological_process	9	circRNA915(LOC111886576)	1	305	5	1283	0.743255
GO:0050832	defense response to fungus	biological_process	7	circRNA112(LOC111878066)	1	305	5	1283	0.743255
GO:0009617	response to bacterium	biological_process	7	circRNA271(LOC111882405)	1	305	5	1283	0.743255
GO:0022627	cytosolic small ribosomal subunit	cellular_component	12	circRNA1408(LOC111888125);circRNA486(LOC111888125)	1	305	5	1283	0.743255
GO:0009873	ethylene-activated signaling pathway	biological_process	8	circRNA271(LOC111882405)	1	305	5	1283	0.743255
GO:0016607	nuclear speck	cellular_component	14	circRNA167(LOC111921257)	1	305	5	1283	0.743255
GO:0005739	mitochondrion	cellular_component	9	circRNA170(LOC111892874);circRNA18(LOC111884285);circRNA21(LOC111919244);circRNA325(LOC111895989);circRNA360(LOC111878746);circRNA363(LOC111902471);circRNA4(LOC111890053);circRNA508(LOC111901800);circRNA519(LOC111879288);circRNA540(LOC111893060);circRNA547(LOC111888552);circRNA571(LOC111921492);circRNA601(LOC111900173);circRNA642(LOC111885804);circRNA660(LOC111888205);circRNA666(LOC111894410);cir…	21	305	99	1283	0.769576
GO:0003824	catalytic activity	molecular_function	3	circRNA229(LOC111893505);circRNA230(LOC111893505);circRNA465(LOC111893505);ciRNA84(LOC111911663)	2	305	11	1283	0.777515
GO:0042802	identical protein binding	molecular_function	5	circRNA622(LOC111881463);circRNA96(LOC111890907)	2	305	11	1283	0.777515
GO:0071555	cell wall organization	biological_process	5	circRNA583(LOC111908040);circRNA935(LOC111901375)	2	305	11	1283	0.777515
GO:0006888	ER to Golgi vesicle-mediated transport	biological_process	7	circRNA545(LOC111876115);circRNA849(LOC111896910)	2	305	11	1283	0.777515
GO:0005737	cytoplasm	cellular_component	7	circRNA1047(LOC111893428);circRNA106(LOC111882643);circRNA118(LOC111891401);circRNA1196(LOC111915286);circRNA1244(LOC111879238);circRNA12(LOC111890540);circRNA1328(LOC111890618);circRNA175(LOC111894597);circRNA180(LOC111886177);circRNA20(LOC111885973);circRNA211(LOC111876920);circRNA228(LOC111880154);circRNA235(LOC111893428);circRNA236(LOC111914688);circRNA237(LOC111914688);circRNA238(LOC11191468…	46	305	211	1283	0.794182
GO:0010228	vegetative to reproductive phase transition of meristem	biological_process	5	circRNA366(LOC111890173)	1	305	6	1283	0.804528
GO:0007030	Golgi organization	biological_process	5	circRNA246(LOC111877354)	1	305	6	1283	0.804528
GO:0010182	sugar mediated signaling pathway	biological_process	8	circRNA245(LOC111898305)	1	305	6	1283	0.804528
GO:0005507	copper ion binding	molecular_function	8	circRNA834(LOC111910329)	1	305	6	1283	0.804528
GO:0042787	protein ubiquitination involved in ubiquitin-dependent protein catabolic process	biological_process	10	circRNA219(LOC111893751)	1	305	6	1283	0.804528
GO:0016042	lipid catabolic process	biological_process	6	circRNA696(LOC111892038)	1	305	6	1283	0.804528
GO:0009505	plant-type cell wall	cellular_component	7	circRNA147(LOC111883025)	1	305	6	1283	0.804528
GO:0042393	histone binding	molecular_function	5	circRNA622(LOC111881463)	1	305	6	1283	0.804528
GO:0006970	response to osmotic stress	biological_process	5	circRNA101(LOC111915859)	1	305	6	1283	0.804528
GO:0003779	actin binding	molecular_function	6	circRNA20(LOC111885973);circRNA236(LOC111914688);circRNA237(LOC111914688);circRNA238(LOC111914688)	2	305	12	1283	0.818781
GO:0006355	regulation of transcription, DNA-templated	biological_process	11	circRNA101(LOC111915859);circRNA1176(LOC111881919);circRNA1370(LOC111884458);circRNA152(LOC111895907);circRNA168(LOC111894897);circRNA257(LOC111880996);circRNA289(LOC111906099);circRNA321(LOC111911961);circRNA359(LOC111892130);circRNA416(LOC111905529);circRNA427(LOC111886967);circRNA42(LOC111902664);circRNA53(LOC111894934);circRNA819(LOC111895907);circRNA81(LOC111876998);circRNA822(LOC111914121)	15	305	75	1283	0.823301
GO:0005789	endoplasmic reticulum membrane	cellular_component	11	circRNA269(LOC111917918);circRNA26(LOC111915462);circRNA553(LOC111909700);circRNA748(LOC111887746);circRNA90(LOC111899395)	5	305	28	1283	0.833068
GO:0005516	calmodulin binding	molecular_function	5	circRNA236(LOC111914688);circRNA237(LOC111914688);circRNA238(LOC111914688);circRNA78(LOC111886089);circRNA798(LOC111893490)	3	305	18	1283	0.83958
GO:0006397	mRNA processing	biological_process	10	circRNA1370(LOC111884458);circRNA168(LOC111894897);circRNA338(LOC111887738)	3	305	18	1283	0.83958
GO:0003700	transcription factor activity, sequence-specific DNA binding	molecular_function	4	circRNA101(LOC111915859);circRNA1370(LOC111884458);circRNA289(LOC111906099);circRNA321(LOC111911961);circRNA359(LOC111892130);circRNA360(LOC111878746);circRNA413(LOC111883669);circRNA641(LOC111897616);circRNA822(LOC111914121)	9	305	48	1283	0.843093
GO:0005484	SNAP receptor activity	molecular_function	5	circRNA668(LOC111909608)	1	305	7	1283	0.851215
GO:0000149	SNARE binding	molecular_function	5	circRNA668(LOC111909608)	1	305	7	1283	0.851215
GO:0031201	SNARE complex	cellular_component	9	circRNA668(LOC111909608)	1	305	7	1283	0.851215
GO:0009555	pollen development	biological_process	7	circRNA149(LOC111886137);circRNA614(LOC111886137)	1	305	7	1283	0.851215
GO:0031969	chloroplast membrane	cellular_component	13	circRNA915(LOC111886576)	1	305	7	1283	0.851215
GO:0009751	response to salicylic acid	biological_process	6	circRNA168(LOC111894897)	1	305	7	1283	0.851215
GO:0048364	root development	biological_process	8	ciRNA11(LOC111921286)	1	305	7	1283	0.851215
GO:0016568	chromatin modification	biological_process	7	circRNA142(LOC111913556);circRNA401(LOC111913556)	1	305	7	1283	0.851215
GO:0009735	response to cytokinin	biological_process	6	ciRNA11(LOC111921286)	1	305	7	1283	0.851215
GO:0009409	response to cold	biological_process	5	circRNA325(LOC111895989);circRNA365(LOC111910617)	2	305	13	1283	0.853067
GO:0000139	Golgi membrane	cellular_component	11	circRNA606(LOC111882217);circRNA766(LOC111878490);circRNA892(LOC111891116)	3	305	19	1283	0.866311
GO:0003723	RNA binding	molecular_function	6	circRNA104(LOC111894694);circRNA1118(LOC111891533);circRNA163(LOC111887406);circRNA167(LOC111921257);circRNA182(LOC111886220);circRNA245(LOC111898305);circRNA338(LOC111887738);circRNA414(LOC111887406);circRNA653(LOC111913269);circRNA91(LOC111893949)	9	305	50	1283	0.876735
GO:0006096	glycolytic process	biological_process	7	circRNA834(LOC111910329)	1	305	8	1283	0.886779
GO:0009626	plant-type hypersensitive response	biological_process	6	circRNA325(LOC111895989)	1	305	8	1283	0.886779
GO:0009860	pollen tube growth	biological_process	8	circRNA468(LOC111900486)	1	305	8	1283	0.886779
GO:0051301	cell division	biological_process	5	circRNA548(LOC111889254);circRNA93(LOC111918008)	2	305	15	1283	0.904533
GO:0009723	response to ethylene	biological_process	6	circRNA271(LOC111882405)	1	305	9	1283	0.913863
GO:0009611	response to wounding	biological_process	5	circRNA123(LOC111892588)	1	305	9	1283	0.913863
GO:0052689	carboxylic ester hydrolase activity	molecular_function	6	circRNA696(LOC111892038)	1	305	9	1283	0.913863
GO:0007067	mitotic nuclear division	biological_process	7	circRNA548(LOC111889254)	1	305	9	1283	0.913863
GO:0003735	structural constituent of ribosome	molecular_function	4	circRNA1408(LOC111888125);circRNA486(LOC111888125);circRNA48(LOC111920386);circRNA730(LOC111920386)	2	305	16	1283	0.923437
GO:0018105	peptidyl-serine phosphorylation	biological_process	9	circRNA820(LOC111884380)	1	305	10	1283	0.934484
GO:0005773	vacuole	cellular_component	9	circRNA102(LOC111889528);circRNA1174(LOC111892427);circRNA491(LOC111895660);circRNA503(LOC111910042);circRNA882(LOC111893507)	5	305	34	1283	0.935193
GO:0006508	proteolysis	biological_process	6	circRNA202(LOC111915340);circRNA220(LOC111912176);circRNA503(LOC111910042)	3	305	23	1283	0.937955
GO:0004553	hydrolase activity, hydrolyzing O-glycosyl compounds	molecular_function	6	circRNA194(LOC111921906)	1	305	11	1283	0.950181
GO:0006979	response to oxidative stress	biological_process	5	circRNA523(LOC111916853)	1	305	11	1283	0.950181
GO:0022625	cytosolic large ribosomal subunit	cellular_component	11	circRNA163(LOC111887406);circRNA414(LOC111887406)	1	305	11	1283	0.950181
GO:0009738	abscisic acid-activated signaling pathway	biological_process	8	circRNA271(LOC111882405)	1	305	11	1283	0.950181
GO:0055114	oxidation-reduction process	biological_process	5	circRNA26(LOC111915462);circRNA333(LOC111903253);circRNA62(LOC111903253);circRNA662(LOC111902705);circRNA748(LOC111887746);circRNA915(LOC111886576)	5	305	36	1283	0.953933
GO:0006412	translation	biological_process	7	circRNA163(LOC111887406);circRNA414(LOC111887406);circRNA48(LOC111920386);circRNA730(LOC111920386)	2	305	19	1283	0.961164
GO:0016491	oxidoreductase activity	molecular_function	4	circRNA748(LOC111887746)	1	305	12	1283	0.962127
GO:0009733	response to auxin	biological_process	6	circRNA289(LOC111906099)	1	305	12	1283	0.962127
GO:0009524	phragmoplast	cellular_component	9	circRNA548(LOC111889254)	1	305	12	1283	0.962127
GO:0005774	vacuolar membrane	cellular_component	11	circRNA126(LOC111892165);circRNA491(LOC111895660);circRNA541(LOC111890855)	3	305	27	1283	0.97261
GO:0005576	extracellular region	cellular_component	3	circRNA147(LOC111883025);circRNA184(LOC111889346);circRNA292(LOC111879374);circRNA412(LOC111914158);circRNA4(LOC111890053);circRNA696(LOC111892038)	6	305	45	1283	0.974453
GO:0016787	hydrolase activity	molecular_function	4	circRNA153(LOC111877815);circRNA64(LOC111894313)	2	305	22	1283	0.980704
GO:0003676	nucleic acid binding	molecular_function	5	circRNA182(LOC111886220);circRNA338(LOC111887738);circRNA653(LOC111913269)	3	305	32	1283	0.99066
GO:0003677	DNA binding	molecular_function	6	circRNA196(LOC111898038);circRNA245(LOC111898305);circRNA321(LOC111911961);circRNA359(LOC111892130);circRNA360(LOC111878746);circRNA42(LOC111902664);circRNA622(LOC111881463);circRNA660(LOC111888205);circRNA822(LOC111914121)	9	305	68	1283	0.991097
GO:0000166	nucleotide binding	molecular_function	5	circRNA167(LOC111921257);circRNA182(LOC111886220)	2	305	27	1283	0.994194
Note: S gene number, number of genes annotated as significant differences for a particular GO; TS gene number, the number of significant differences in gene; B gene number, the number of genes annotated as a specific GO; TB gene number, total number of genes.

## Sheet: KEGG
Table S3. GO and KEGG enrichment analysis of differentially expressed circRNA-hosting genes
pathway_id	pathway_name	Genes	S gene number	TS gene number	B gene number	TB gene number	pvalue
ko00920	Sulfur metabolism	circRNA652(LOC111893968);circRNA993(LOC111902253);ciRNA40(LOC111890748);ciRNA41(LOC111909603)	4	179	6	734	0.0338522
ko04144	Endocytosis	circRNA126(LOC111892165);circRNA12(LOC111890540);circRNA169(LOC111919020);circRNA185(LOC111876585);circRNA186(LOC111876584);circRNA188(LOC111880132);circRNA189(LOC111880132);circRNA228(LOC111880154);circRNA282(LOC111878917);circRNA283(LOC111878917);circRNA379(LOC111889166);circRNA417(LOC111919020);circRNA513(LOC111911566);circRNA51(LOC111879789);circRNA523(LOC111916853);circRNA536(LOC111879789);c…	19	179	54	734	0.0431334
ko00073	Cutin, suberine and wax biosynthesis	circRNA333(LOC111903253);circRNA62(LOC111903253);circRNA660(LOC111888205);circRNA74(LOC111905397)	3	179	4	734	0.0469358
ko00061	Fatty acid biosynthesis	circRNA112(LOC111878066);circRNA203(LOC111896959);circRNA285(LOC111878886);ciRNA11(LOC111921286)	4	179	7	734	0.0641148
ko04146	Peroxisome	circRNA112(LOC111878066);circRNA170(LOC111892874);circRNA203(LOC111896959);circRNA285(LOC111878886);circRNA345(LOC111884945);circRNA376(LOC111915140);circRNA453(LOC111878431);circRNA74(LOC111905397)	8	179	19	734	0.0657196
ko00030	Pentose phosphate pathway	circRNA1099(LOC111905483);circRNA1328(LOC111890618);circRNA150(LOC111889217);circRNA373(LOC111882285);circRNA707(LOC111915996)	5	179	10	734	0.0698087
ko01230	Biosynthesis of amino acids	circRNA1099(LOC111905483);circRNA150(LOC111889217);circRNA286(LOC111898181);circRNA325(LOC111895989);circRNA373(LOC111882285);circRNA652(LOC111893968);circRNA707(LOC111915996);circRNA993(LOC111902253);ciRNA40(LOC111890748);ciRNA84(LOC111911663)	10	179	27	734	0.0949368
ko00564	Glycerophospholipid metabolism	circRNA106(LOC111882643);circRNA108(LOC111885894);circRNA361(LOC111921655);circRNA469(LOC111879165);circRNA547(LOC111888552);circRNA89(LOC111911751)	6	179	14	734	0.099089
ko01212	Fatty acid metabolism	circRNA112(LOC111878066);circRNA203(LOC111896959);circRNA285(LOC111878886);circRNA468(LOC111900486);ciRNA11(LOC111921286)	5	179	11	734	0.103386
ko00230	Purine metabolism	circRNA198(LOC111905952);circRNA275(LOC111881718);circRNA373(LOC111882285);circRNA399(LOC111901299);circRNA571(LOC111921492);circRNA71(LOC111888550)	6	179	15	734	0.132913
ko04141	Protein processing in endoplasmic reticulum	circRNA168(LOC111894897);circRNA209(LOC111898538);circRNA22(LOC111906903);circRNA282(LOC111878917);circRNA283(LOC111878917);circRNA394(LOC111915010);circRNA51(LOC111879789);circRNA531(LOC111891652);circRNA536(LOC111879789);circRNA683(LOC111887277);circRNA849(LOC111896910);circRNA951(LOC111892922)	10	179	30	734	0.170347
ko00520	Amino sugar and nucleotide sugar metabolism	circRNA114(LOC111896753);circRNA115(LOC111896753);circRNA116(LOC111896753);circRNA229(LOC111893505);circRNA230(LOC111893505);circRNA35(LOC111897124);circRNA405(LOC111920660);circRNA465(LOC111893505);circRNA583(LOC111908040);circRNA674(LOC111905689);circRNA723(LOC111897124);circRNA766(LOC111878490);circRNA935(LOC111901375)	8	179	23	734	0.173724
ko04626	Plant-pathogen interaction	circRNA101(LOC111915859);circRNA103(LOC111884224);circRNA120(LOC111904707);circRNA122(LOC111892623);circRNA1250(LOC111917198);circRNA184(LOC111889346);circRNA258(LOC111887164);circRNA273(LOC111885436);circRNA31(LOC111914799);circRNA32(LOC111914798);circRNA347(LOC111921038);circRNA34(LOC111906690);circRNA356(LOC111897892);circRNA412(LOC111914158);circRNA464(LOC111880005);circRNA646(LOC111917394);c…	19	179	64	734	0.187731
ko00590	Arachidonic acid metabolism	circRNA89(LOC111911751)	1	179	1	734	0.243869
ko00591	Linoleic acid metabolism	circRNA89(LOC111911751)	1	179	1	734	0.243869
ko00254	Aflatoxin biosynthesis	ciRNA11(LOC111921286)	1	179	1	734	0.243869
ko00196	Photosynthesis - antenna proteins	ciRNA8(LOC111878096)	1	179	1	734	0.243869
ko00945	Stilbenoid, diarylheptanoid and gingerol biosynthesis	circRNA333(LOC111903253);circRNA62(LOC111903253);circRNA662(LOC111902705)	2	179	4	734	0.251109
ko03060	Protein export	circRNA396(LOC111898893);circRNA413(LOC111883669)	2	179	4	734	0.251109
ko00592	alpha-Linolenic acid metabolism	circRNA548(LOC111889254);circRNA89(LOC111911751)	2	179	4	734	0.251109
ko04075	Plant hormone signal transduction	circRNA102(LOC111889528);circRNA120(LOC111904707);circRNA123(LOC111892588);circRNA1250(LOC111917198);circRNA1331(LOC111876416);circRNA160(LOC111912183);circRNA257(LOC111880996);circRNA271(LOC111882405);circRNA27(LOC111915463);circRNA289(LOC111906099);circRNA439(LOC111920243);circRNA44(LOC111914111);circRNA474(LOC111899648);circRNA522(LOC111915463);circRNA778(LOC111904707);circRNA94(LOC111878484)	14	179	49	734	0.29058
ko00071	Fatty acid degradation	circRNA112(LOC111878066);circRNA203(LOC111896959);circRNA285(LOC111878886);circRNA468(LOC111900486)	4	179	12	734	0.331643
ko00562	Inositol phosphate metabolism	circRNA188(LOC111880132);circRNA189(LOC111880132);circRNA219(LOC111893751);circRNA243(LOC111909829)	3	179	9	734	0.382045
ko00500	Starch and sucrose metabolism	circRNA114(LOC111896753);circRNA115(LOC111896753);circRNA116(LOC111896753);circRNA147(LOC111883025);circRNA158(LOC111911063);circRNA194(LOC111921906);circRNA540(LOC111893060);circRNA583(LOC111908040);circRNA766(LOC111878490);circRNA923(LOC111907753);circRNA935(LOC111901375);circRNA93(LOC111918008)	10	179	37	734	0.414352
ko01200	Carbon metabolism	circRNA1099(LOC111905483);circRNA1328(LOC111890618);circRNA150(LOC111889217);circRNA325(LOC111895989);circRNA373(LOC111882285);circRNA453(LOC111878431);circRNA468(LOC111900486);circRNA707(LOC111915996);circRNA737(LOC111883291);circRNA834(LOC111910329);circRNA993(LOC111902253);ciRNA40(LOC111890748)	12	179	45	734	0.415187
ko00905	Brassinosteroid biosynthesis	circRNA948(LOC111876869)	1	179	2	734	0.428518
ko00563	Glycosylphosphatidylinositol(GPI)-anchor biosynthesis	circRNA319(LOC111883268)	1	179	2	734	0.428518
ko00072	Synthesis and degradation of ketone bodies	circRNA468(LOC111900486)	1	179	2	734	0.428518
ko00640	Propanoate metabolism	circRNA468(LOC111900486);ciRNA11(LOC111921286)	2	179	6	734	0.451817
ko03040	Spliceosome	circRNA104(LOC111894694);circRNA155(LOC111911774);circRNA15(LOC111909092);circRNA163(LOC111887406);circRNA167(LOC111921257);circRNA282(LOC111878917);circRNA283(LOC111878917);circRNA414(LOC111887406);circRNA428(LOC111898325);circRNA51(LOC111879789);circRNA536(LOC111879789)	8	179	30	734	0.454606
ko00270	Cysteine and methionine metabolism	circRNA652(LOC111893968);circRNA993(LOC111902253);ciRNA40(LOC111890748);ciRNA84(LOC111911663)	4	179	14	734	0.457395
ko03008	Ribosome biogenesis in eukaryotes	circRNA109(LOC111901567);circRNA110(LOC111901567);circRNA1176(LOC111881919);circRNA1208(LOC111877591);circRNA163(LOC111887406);circRNA305(LOC111916017);circRNA414(LOC111887406);circRNA53(LOC111894934);circRNA81(LOC111876998);circRNA913(LOC111888857)	8	179	31	734	0.496594
ko03022	Basal transcription factors	circRNA192(LOC111877504);circRNA416(LOC111905529);circRNA427(LOC111886967);circRNA494(LOC111909597)	4	179	15	734	0.517494
ko00970	Aminoacyl-tRNA biosynthesis	circRNA363(LOC111902471);circRNA601(LOC111900173);circRNA666(LOC111894410);circRNA892(LOC111891116)	4	179	15	734	0.517494
ko04145	Phagosome	circRNA243(LOC111909829);circRNA491(LOC111895660);circRNA542(LOC111900571)	3	179	11	734	0.526608
ko00903	Limonene and pinene degradation	circRNA333(LOC111903253);circRNA62(LOC111903253);circRNA662(LOC111902705)	2	179	7	734	0.540457
ko04070	Phosphatidylinositol signaling system	circRNA188(LOC111880132);circRNA189(LOC111880132);circRNA243(LOC111909829)	2	179	7	734	0.540457
ko00250	Alanine, aspartate and glutamate metabolism	circRNA399(LOC111901299);circRNA71(LOC111888550)	2	179	7	734	0.540457
ko00380	Tryptophan metabolism	circRNA453(LOC111878431);circRNA468(LOC111900486)	2	179	7	734	0.540457
ko04712	Circadian rhythm - plant	circRNA1031(LOC111878838);circRNA96(LOC111890907)	2	179	7	734	0.540457
ko00100	Steroid biosynthesis	circRNA748(LOC111887746);circRNA89(LOC111911751)	2	179	7	734	0.540457
ko03015	mRNA surveillance pathway	circRNA182(LOC111886220);circRNA245(LOC111898305);circRNA281(LOC111900081);circRNA493(LOC111894376);circRNA622(LOC111881463);circRNA792(LOC111907258)	6	179	24	734	0.552192
ko00290	Valine, leucine and isoleucine biosynthesis	ciRNA84(LOC111911663)	1	179	3	734	0.568265
ko00770	Pantothenate and CoA biosynthesis	ciRNA84(LOC111911663)	1	179	3	734	0.568265
ko00400	Phenylalanine, tyrosine and tryptophan biosynthesis	circRNA286(LOC111898181)	1	179	3	734	0.568265
ko00195	Photosynthesis	circRNA586(LOC111901950);circRNA618(LOC111884373)	2	179	8	734	0.618694
ko04120	Ubiquitin mediated proteolysis	circRNA1031(LOC111878838);circRNA443(LOC111889597);circRNA505(LOC111908577);circRNA96(LOC111890907)	4	179	17	734	0.627239
ko00565	Ether lipid metabolism	circRNA89(LOC111911751)	1	179	4	734	0.673984
ko00909	Sesquiterpenoid and triterpenoid biosynthesis	circRNA748(LOC111887746)	1	179	4	734	0.673984
ko00450	Selenocompound metabolism	circRNA652(LOC111893968)	1	179	4	734	0.673984
ko00670	One carbon pool by folate	circRNA325(LOC111895989)	1	179	4	734	0.673984
ko00760	Nicotinate and nicotinamide metabolism	circRNA275(LOC111881718)	1	179	4	734	0.673984
ko00900	Terpenoid backbone biosynthesis	circRNA468(LOC111900486)	1	179	4	734	0.673984
ko00650	Butanoate metabolism	circRNA468(LOC111900486)	1	179	4	734	0.673984
ko00280	Valine, leucine and isoleucine degradation	circRNA468(LOC111900486);ciRNA84(LOC111911663)	2	179	9	734	0.686307
ko00460	Cyanoamino acid metabolism	circRNA325(LOC111895989);circRNA923(LOC111907753)	2	179	9	734	0.686307
ko00240	Pyrimidine metabolism	circRNA198(LOC111905952);circRNA275(LOC111881718)	2	179	9	734	0.686307
ko03013	RNA transport	circRNA1272(LOC111905994);circRNA136(LOC111920529);circRNA182(LOC111886220);circRNA245(LOC111898305);circRNA514(LOC111900903);circRNA57(LOC111897745);circRNA622(LOC111881463);circRNA913(LOC111888857);circRNA97(LOC111890918)	9	179	41	734	0.70541
ko00561	Glycerolipid metabolism	circRNA108(LOC111885894);circRNA469(LOC111879165);circRNA696(LOC111892038);circRNA89(LOC111911751)	4	179	19	734	0.719834
ko00630	Glyoxylate and dicarboxylate metabolism	circRNA325(LOC111895989);circRNA453(LOC111878431);circRNA468(LOC111900486);circRNA737(LOC111883291)	4	179	19	734	0.719834
ko04140	Regulation of autophagy	circRNA247(LOC111905299)	1	179	5	734	0.753925
ko03020	RNA polymerase	circRNA198(LOC111905952)	1	179	5	734	0.753925
ko00510	N-Glycan biosynthesis	circRNA269(LOC111917918)	1	179	5	734	0.753925
ko01210	2-Oxocarboxylic acid metabolism	ciRNA84(LOC111911663)	1	179	5	734	0.753925
ko00531	Glycosaminoglycan degradation	circRNA18(LOC111884285)	1	179	5	734	0.753925
ko00620	Pyruvate metabolism	circRNA468(LOC111900486);circRNA78(LOC111886089);circRNA834(LOC111910329);ciRNA11(LOC111921286)	4	179	20	734	0.759324
ko00190	Oxidative phosphorylation	circRNA1109(LOC111913855);circRNA387(LOC111887675);circRNA491(LOC111895660)	3	179	16	734	0.790165
ko02010	ABC transporters	circRNA345(LOC111884945);circRNA376(LOC111915140);circRNA541(LOC111890855)	3	179	16	734	0.790165
ko00710	Carbon fixation in photosynthetic organisms	circRNA1099(LOC111905483);circRNA1328(LOC111890618);circRNA707(LOC111915996)	3	179	16	734	0.790165
ko00010	Glycolysis / Gluconeogenesis	circRNA1328(LOC111890618);circRNA358(LOC111913863);circRNA834(LOC111910329)	3	179	16	734	0.790165
ko00940	Phenylpropanoid biosynthesis	circRNA1196(LOC111915286);circRNA923(LOC111907753)	2	179	11	734	0.792068
ko00480	Glutathione metabolism	circRNA152(LOC111895907);circRNA819(LOC111895907)	1	179	6	734	0.814347
ko03420	Nucleotide excision repair	circRNA192(LOC111877504);circRNA42(LOC111902664);circRNA494(LOC111909597)	3	179	17	734	0.825077
ko03018	RNA degradation	circRNA127(LOC111881148);circRNA182(LOC111886220);circRNA622(LOC111881463);circRNA76(LOC111886111);circRNA77(LOC111886111)	4	179	23	734	0.852234
ko00051	Fructose and mannose metabolism	circRNA1328(LOC111890618)	1	179	7	734	0.859995
ko00040	Pentose and glucuronate interconversions	circRNA147(LOC111883025)	1	179	7	734	0.859995
ko00020	Citrate cycle (TCA cycle)	circRNA834(LOC111910329)	1	179	7	734	0.859995
ko00330	Arginine and proline metabolism	circRNA26(LOC111915462)	1	179	7	734	0.859995
ko00260	Glycine, serine and threonine metabolism	circRNA325(LOC111895989);circRNA737(LOC111883291)	2	179	14	734	0.892166
ko00053	Ascorbate and aldarate metabolism	circRNA219(LOC111893751)	1	179	8	734	0.894467
ko00906	Carotenoid biosynthesis	circRNA915(LOC111886576)	1	179	8	734	0.894467
ko03050	Proteasome	circRNA46(LOC111911243)	1	179	9	734	0.920487
ko03440	Homologous recombination	circRNA236(LOC111914688);circRNA237(LOC111914688);circRNA238(LOC111914688)	1	179	9	734	0.920487
ko00860	Porphyrin and chlorophyll metabolism	circRNA719(LOC111895632)	1	179	10	734	0.940118
ko00310	Lysine degradation	circRNA468(LOC111900486)	1	179	11	734	0.954923
ko03010	Ribosome	circRNA1408(LOC111888125);circRNA486(LOC111888125);circRNA641(LOC111897616)	2	179	18	734	0.957401
Note: S gene number, number of genes annotated as significant differences for a particular GO; TS gene number, the number of significant differences in gene; B gene number, the number of genes annotated as a specific GO; TB gene number, total number of genes.
